Preprint

## Nav1.2 and BK channels interaction shapes the action potential in the axon initial segment

**Luiza Filipis**<sup>1,2,5</sup>, **Laila Ananda Blömer**<sup>1,2,5</sup>, **Jérôme Montnach**<sup>2,3</sup>, **Michel De Waard**<sup>2,3</sup>, **Marco Canepari**<sup>1,2,4</sup>

<sup>1</sup>Univ. Grenoble Alpes, CNRS, LIPhy, F-38000 Grenoble, France. <sup>2</sup>Laboratories of Excellence, Ion Channel Science and Therapeutics, F-06560 Valbonne, France. <sup>3</sup>l'institut du thorax, INSERM, CNRS, UNIV NANTES, F-44007 Nantes, France. <sup>4</sup>Institut National de la Santé et Recherche Médicale, Paris, France. <sup>5</sup>These authors contributed equally.

**Address of the submitting and corresponding author:** Marco Canepari, Laboratoire Interdisciplinaire de Physique (UMR 5588), Bat. E45, 140 avenue de la physique, Domaine univ., 38402 St Martin d'Hères cedex, France. Email: marco.canepari@univ-grenoble-alpes.fr

**Acknowledgements:** This work was supported by the *Agence Nationale de la Recherche* through three grants (ANR-18-CE19-0024 - OptChemCom; Labex *Ion Channels Science and Therapeutics*: program number ANR-11-LABX-0015 and National Infrastructure France Life Imaging “Noeud Grenoblois”) and by the *Federation pour la Recherche sur le Cerveau* (FRC – Grant *Espoir en tête*, Rotary France). We are indebted to Fondation Leducq and the FEDER resources for financing the automated patch clamp setup.

**Author contributions:** L.F., L.A.B. and M.C. designed the research, L.F. and L.A.B. performed brain slice research and data analysis, J.M. and M.d.W. designed the novel peptide and characterised ion channel selectivity of peptides, L.F. developed the NEURON model and performed computer simulations, M.C. wrote the paper. All authors have given approval to the final version of the manuscript.

**Competing interests:** *The authors declare no competing interests.*

**Keywords:** Na<sub>v</sub>1.2 channel, BK Ca<sup>2+</sup>-activated K<sup>+</sup> channel, axon initial segment, action potential, neocortical layer-5 pyramidal neuron, calcium.

Number of figures: 6. Number of Supplementary Figures: 8.

Number of words for title (14) and for abstract (149).

## ABSTRACT

In neocortical layer-5 pyramidal neurons, the action potential (AP) is generated in the axon initial segment (AIS) when the membrane potential ( $V_m$ ) reaches the threshold for activation of two diverse voltage-gated  $\text{Na}^+$  channels, that differ in spatial distribution and biophysical properties. Yet, the understanding of specific functional differences between these two channels remains elusive. Here, using ultrafast  $\text{Na}^+$ ,  $V_m$  and  $\text{Ca}^{2+}$  imaging in combination with partial block of  $\text{Na}_v1.2$  by a recent peptide, we demonstrate an exclusive role of  $\text{Na}_v1.2$  in shaping the generating AP. Precisely,  $\text{Ca}^{2+}$  influx *via*  $\text{Na}_v1.2$  activates BK  $\text{Ca}^{2+}$ -activated  $\text{K}^+$  channels determining the amplitude and the early phase of repolarisation of the AP in the AIS. We mimicked this result with a NEURON model where the role of the different ion channels tested reproduced the experimental evidence. The exclusive role of  $\text{Na}_v1.2$  reported here is important for understanding the physiology and pathology of neuronal excitability.

## Introduction

In most mammalian neurons, the action potential (AP) is generated in the axon initial segment (AIS) where its waveform is shaped [1]. After generation, the AP propagates along the axonal branches, regenerates at Ranvier nodes, and the waveform at synaptic terminals regulates neurotransmitter release providing an analog modulation of synaptic transmission [2]. The AP from the AIS also back-propagates to the soma and then along the dendrites, progressively changing its shape and regulating synaptic integration [3]. Eventually, the AP waveform in the AIS sets the way in which a neuron can respond to prolonged depolarisation by firing several APs at high frequencies, determining the ability of the neuron to encode signals [4]. The build-up of the AP waveform in the AIS is the result of the sequential activation, inactivation and de-activation of diverse voltage-gated ion channels [5]. In this cascade of events, the activation of voltage-gated Na<sup>+</sup> channels (VGNCs) is the first step. In the AIS of excitatory pyramidal neurons, Na<sub>v</sub>1.2 and Na<sub>v</sub>1.6 are the two isoforms of VGNCs present [6] and the understanding of the functional role of these two channels is therefore a fundamental piece of information necessary to link the AP shape to the later sequence of ion-channel activation and de-activation steps. Specifically, in neocortical layer-5 (L5) pyramidal neurons, these two channels have different axonal distributions [7] and biophysical properties [8]. The Na<sup>+</sup> current associated with the AP is characterised by a fast inactivating component and by a non-inactivating component [9]. Na<sub>v</sub>1.6-deficient mice are characterized by a reduced non-inactivating Na<sup>+</sup> current [10], whereas Na<sub>v</sub>1.2-deficient mice are characterized by reduced dendritic excitability and synaptic function [11]. Finally, it was recently found that Na<sub>v</sub>1.2 channels are not only permeable to Na<sup>+</sup>, but also to Ca<sup>2+</sup>, and that a Ca<sup>2+</sup> influx mediated by VGNCs occurs during the AP in the AIS [12]. The precise native role of Na<sub>v</sub>1.2 and Na<sub>v</sub>1.6, however, and their contributions to AP generation remains to be understood. Dysfunctions of these channels are the cause of neuronal disorders in patients carrying critical mutations in their encoding genes. In the case of Na<sub>v</sub>1.2, several gene variants cause diverse neuropsychiatric syndromes including epilepsies with different degree of severity, intellectual disability and autism with or without epileptic seizures [13]. Also, channelopathies of Na<sub>v</sub>1.6 are associated with rare but severe cases of epileptic encephalopathy [14]. Clearly, shedding light on the signaling processes triggered by VGNCs is an important step for the development of innovative therapeutic strategies to tackle these genetic pathologies, but this goal requires first a thorough understanding of the contributive role of each channel subtype to neuronal excitability.

Until recently, the study of the activation and signaling of one specific VGNC isoform has been limited by a series of experimental obstacles. First, although partially selective, VGNC blockers act on several isoforms and acceptable discriminative selectivity between Na<sub>v</sub>1.2 and Na<sub>v</sub>1.6 could not be achieved until now. Second, the inhomogeneous distribution of VGNCs, as well as the site-dependence of the AP waveform, requires recording ion concentrations and V<sub>m</sub> transients at high spatial and temporal resolution for a proper understanding of the role of each channel subtype. Finally, the change of membrane potential (V<sub>m</sub>) transients induced by VGNC inhibition affects the activation of the other voltage-gated ion channels involved in the AP shaping. This important synergy of diverse ion channels, underlying the AP generation, makes the combined analysis of all these channels necessary. In this study, we tackled all these challenges and analysed the role of native Na<sub>v</sub>1.2 in the generation of the AP. This analysis was grounded on a partial but selective and stable effect on Na<sub>v</sub>1.2, with respect to Na<sub>v</sub>1.6, using a recent peptide mutated from a wild-type animal toxin. In the AIS of L5 pyramidal neurons, we optically measured Na<sup>+</sup> currents [15], V<sub>m</sub> transients [16] and Ca<sup>2+</sup> currents

[17-19] associated with APs elicited by somatic current injections and we analysed how the partial block of  $\text{Na}_v1.2$  affected these signals. We then focussed on the changes of these signals produced by fully blocking voltage-gated  $\text{Ca}^{2+}$  channels (VGCCs) and/or  $\text{Ca}^{2+}$ -activated  $\text{K}^+$  channels (CAKCs) in order to correlate  $\text{Na}_v1.2$  signalling with the activation of these channels. To assess whether the role of  $\text{Na}_v1.2$  was exclusive, we performed control experiments using the partially selective  $\text{Na}_v1.6$  inhibitor 4,9-anhydrotetrodotoxin. Finally, in order to reconstruct the sequence of activation of the channels underlying the shaping of the generating AP, we built a NEURON model starting from the experience of existing models of the AIS of L5 pyramidal neurons [7, 12, 20-24], available in the NeuroDB database. The strategy, already used to realistically reconstruct the activation of the diverse dendritic ionic currents following a climbing fibre synaptic potential in cerebellar Purkinje neurons [25], consisted in reproducing the experimental profiles of ionic and  $V_m$  transients and their modifications following selective blocks of individual channel types. In this way, we could mimic the experimental effect of partially blocking  $\text{Na}_v1.2$  on the shape of the AP in the AIS.

## Results

### **G<sup>1</sup>G<sup>4</sup>-huwentoxin-IV is selective for $\text{Na}_v1.2$ against $\text{Na}_v1.6$**

The first necessary condition to unambiguously investigate the role of  $\text{Na}_v1.2$  in the AP generation at the AIS of L5 pyramidal neurons is the availability of a selective blocker of this channel that is specifically inert with respect to  $\text{Na}_v1.6$ . Phrixotoxin-3 [26] has been reported to be selective for  $\text{Na}_v1.2$ , but when we tested this peptide in L5 pyramidal neurons we found variable and rapidly reversible effects at the lowest concentrations where this selectivity is expected to apply. Thus, to produce a less reversible and still selective effect on  $\text{Na}_v1.2$  channels, we used a peptide modified from huwentoxin-IV [27] where the two glutamate residues at positions 1 and 4 were replaced with two glycine residues. The peptide (G<sup>1</sup>G<sup>4</sup>-huwentoxin-IV or simply hwtx herein) exhibits higher selectivity for  $\text{Na}_v1.2$  with respect to  $\text{Na}_v1.6$  at nanomolar concentrations as measured in HEK293 cells using automated patch-clamp recordings (Supplementary Fig. S1). Specifically, at 1 nM and 3.3 nM, hwtx blocks  $16 \pm 7\%$  and  $53 \pm 7\%$   $\text{Na}_v1.2$  currents respectively, and only  $5 \pm 4\%$  and  $9 \pm 5\%$   $\text{Na}_v1.6$  currents respectively. The challenge remained to exploit this selectivity by locally blocking  $\text{Na}_v1.2$  in the AIS of L5 pyramidal neurons in the context of brain slices in which effective concentrations may differ. In this study, we used the experimental configuration illustrated in Supplementary Fig. S2a. L5 pyramidal neurons were patched in the cell body and another pipette near the AIS was used to locally deliver selective channel blockers, for 1 minute, by gentle pressure application. In this way, when we delivered hwtx at 40 nM, the peptide did not affect the AP (Supplementary Fig. S1). The smallest concentration at which we consistently observed an effect was 80 nM and this effect was a delay in the AP onset and peak with occasionally a small decrease in amplitude (Supplementary Fig. S1). Finally, at 160 nM, hwtx consistently produced a longer delay and decreased the amplitude of the AP. Importantly for this project, at all concentrations, the consistent effects of hwtx were stable for several minutes after delivery, in sharp contrast to the case of phrixotoxin application. We could therefore use hwtx at 80 nM concentration to investigate  $\text{Na}^+$ ,  $V_m$  and  $\text{Ca}^{2+}$  signals associated with an AP, on the hypothesis that at this minimal concentration the peptide should produce a partial but selective block on  $\text{Na}_v1.2$  because this channel type is more sensitive than  $\text{Na}_v1.6$  to hwtx block. To this purpose, the protocol that we used in this

study for ultrafast imaging from the AIS at 10 kHz is illustrated in [Supplementary Fig. S2b](#). Given the morphological variability, we standardised our analyses to regions of 5  $\mu\text{m}$  lengths within the proximal (prox) part of the AIS, at 5-15  $\mu\text{m}$  from soma, indicated with "1" in all figures, and to regions of 5  $\mu\text{m}$  lengths within distal (dist) parts of the AIS, at 30-40  $\mu\text{m}$  from soma, indicated with "2" in all the figures. [Fig. 1a](#) shows the AIS of a neuron filled with the  $\text{Na}^+$  indicator Ion Natrium Green-2 (ING-2).

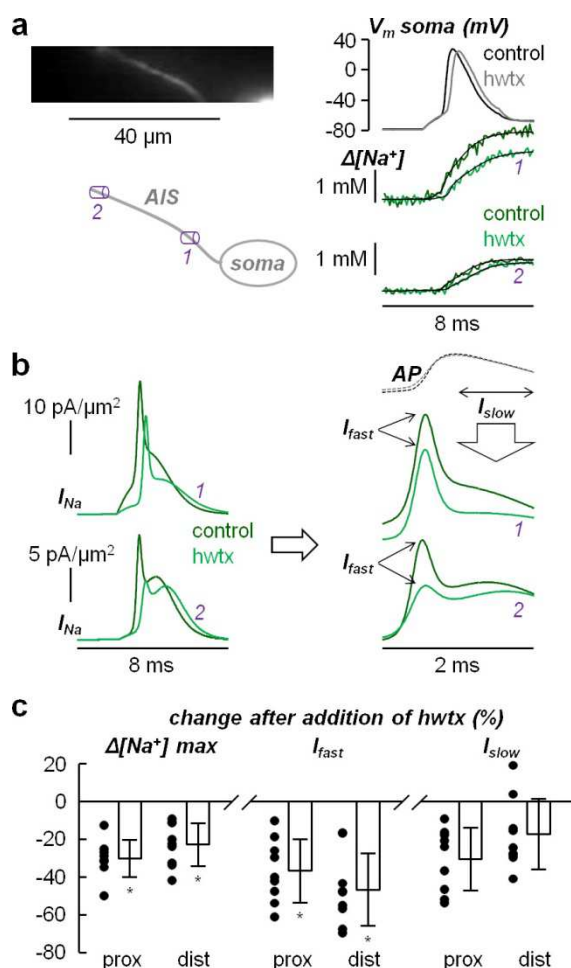

**Fig. 1 | Effect of hwtx (block of Nav1.2) on the  $\text{Na}^+$  influx in the AIS.**

**a**, Left, fluorescence image ( $\text{Na}^+$  indicator ING-2) of the AIS and its reconstruction with a proximal region (1) and a distal region (2) indicated. Right, Somatic AP in control solution and after local delivering 80 nM of hwtx (top) and associated corrected  $\text{Na}^+$  transients fitted with a model function in 1 and 2. **b**, Left, from the experiment in a,  $\text{Na}^+$  currents calculated from the time-derivative of the  $\text{Na}^+$  transient fits. Right, zoom of the  $\text{Na}^+$  currents 1 ms before and 1 ms after the AP peak indicating the fast component of the  $\text{Na}^+$  current ( $I_{\text{fast}}$ ) and the slow component of the  $\text{Na}^+$  current ( $I_{\text{slow}}$ ) defined as the mean  $\text{Na}^+$  current during the 1-ms interval after the AP peak. **c**, Left, single cell values and percentage change (N=9 cells) of the  $\text{Na}^+$  transient maximum after locally delivering of hwtx in proximal regions (mean  $\pm$  SD =  $-30.3 \pm 9.8$ ), and in distal regions (mean  $\pm$  SD =  $-22.9 \pm 11.4$ ). Centre, single cell values and percentage change of  $I_{\text{fast}}$  after locally delivering hwtx in proximal regions (mean  $\pm$  SD =  $-36.6 \pm 16.7$ ), and in distal regions (mean  $\pm$  SD =  $-46.8 \pm 19.2$ ). Right, single cell values and percentage change of  $I_{\text{slow}}$  after addition of hwtx in proximal regions (mean  $\pm$  SD =  $-30.7 \pm 16.6$ ), and in distal regions (mean  $\pm$  SD =  $-17.5 \pm 18.6$ ). "\*\*" indicates a significant change ( $p < 0.01$ , paired t-test).

The sodium concentration change ( $\Delta[\text{Na}^+]$ ) associated with an AP was quantitatively measured as previously described [15] and the  $\text{Na}^+$  current ( $I_{\text{Na}}$ ) was calculated as the time-derivative of the fit of the  $\Delta[\text{Na}^+]$  signal using a model function ([Fig. 1b](#)). In the example of [Fig. 1a](#), application of 80 nM hwtx produced a decrease of  $\sim 30\%$  of the  $\Delta[\text{Na}^+]$  signal in the proximal part of the AIS and a  $\sim 15\%$  decrease in the distal part. As already reported [15], the  $I_{\text{Na}}$  is characterised by a fast inactivating component ( $I_{\text{fast}}$ ) and a slow non-inactivating component ( $I_{\text{slow}}$ ). Thus, we systematically evaluated the change in the  $I_{\text{fast}}$  peak and in the  $I_{\text{slow}}$  (defined as the mean  $I_{\text{Na}}$  in the millisecond following the AP peak) after hwtx. On average, in 9 cells analysed, we found a significant ( $p < 0.01$ , paired t-test) decrease in the  $\Delta[\text{Na}^+]$  and in the  $I_{\text{fast}}$  signals, both in proximal and distal regions, whereas a consistent but more variable decrease in the  $I_{\text{slow}}$  signals was estimated. In proximal regions, where  $\text{Na}_v1.2$  is expected to be dominant, the decrease in  $\Delta[\text{Na}^+]$  and  $I_{\text{fast}}$  signals were 30% and 36% respectively, indicating a block of 30-40% of  $\text{Na}^+$  channels. According to the selectivity curve reported in [Supplementary Fig. S1](#), this percentage block is within the range where hwtx is inert to  $\text{Na}_v1.6$ .



## The selective block of Na<sub>v</sub>1.2 widens the generating AP waveform in the AIS

The important finding that local delivery of 80 nM hwtx blocks 30-40% of Na<sub>v</sub>1.2 without affecting Na<sub>v</sub>1.6 allowed us performing further experiments with high confidence using hwtx at 80 nM. It permitted the analysis of the axonal AP waveform change after reducing Na<sub>v</sub>1.2, using V<sub>m</sub> imaging with the voltage-sensitive dye JPW1114. In the example of Fig. 2a, application of 80 nM hwtx delayed the onset of the AP, consistently to what we reported in Fig. 1 and in Supplementary Fig. S1.

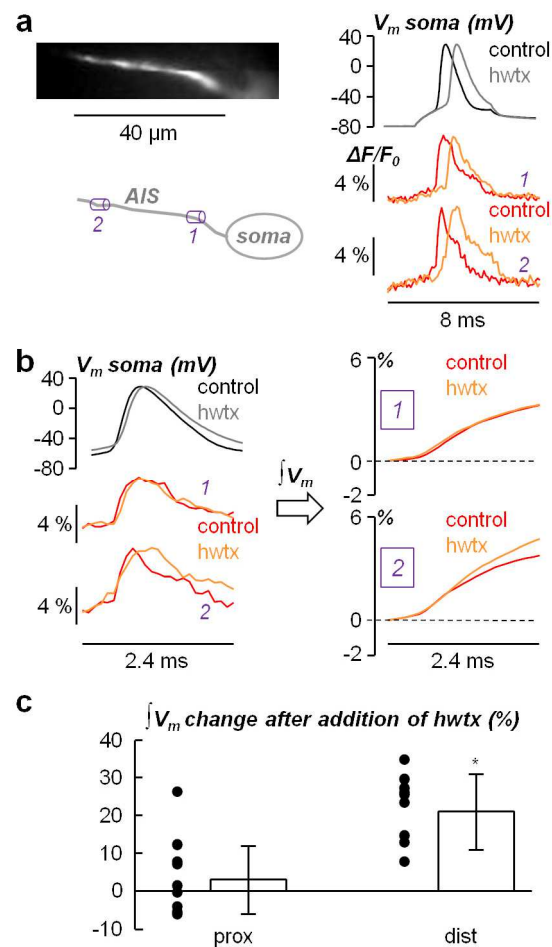

**Fig. 2 | Effect of hwtx (block of Nav1.2) on the AP waveform in the AIS.** **a**, Left, fluorescence image (voltage sensitive dye JPW1114) of the AIS and its reconstruction with a proximal region (1) and a distal region (2) indicated. Right, Somatic AP in control solution and after locally delivering 80 nM of hwtx (top) and associated V<sub>m</sub> transients in 1 and 2. **b**, Left, somatic and axonal APs at a different time scale (2.4 ms duration) visually indicating a widening of the AP waveform, in the distal position only, after locally delivering hwtx. Right, quantification of the AP waveform shape by calculation of V<sub>m</sub> integral ( $\int V_m$ ) over the 2.4 ms time window comprising the AP signal. **c**, Single cell values and percentage change (N=9 cells) of the  $\int V_m$  signal maximum after locally delivering hwtx in proximal regions (mean  $\pm$  SD = 3.2  $\pm$  8.8), and in distal regions (mean  $\pm$  SD = 21.3  $\pm$  10.5). "\*" indicates a significant change (p<0.01, paired t-test).

In the distal AIS, however, it also changed the shape of the AP by widening its waveform (Fig. 2b). To reliably quantify the waveform change beyond the noise limitations, we calculated the time integral of the V<sub>m</sub> signal in control conditions and after hwtx application over a time-window of 2.4 milliseconds containing the AP ( $\int V_m$ ). Notably, in 9 cells analysed, the  $\int V_m$  at its last value significantly increased by 21.3  $\pm$  10.5 % (p<0.01, paired t-test) in the distal regions of the AIS (Fig. 2c). This result indicates that Na<sub>v</sub>1.2 is contributing to the shaping of the generating AP by sharpening its waveform. The widening of the AP waveform, however, cannot be produced by a reduction of a Na<sup>+</sup> (inward) current. The phenomenon reported in Fig. 2 can only be explained if the partial block of Na<sub>v</sub>1.2 is also associated with a reduction of the outward current which must be larger than the Na<sup>+</sup> current change in the early phase of the AP repolarisation. The output current underlying the AP repolarisation is mediated by K<sup>+</sup> channels. Since the AP amplitude is not significantly affected by the partial block of Na<sub>v</sub>1.2, any variation of current mediated by voltage-gated K<sup>+</sup> channels (VGKCs) is minimal. The most likely hypothesis is therefore that CAKCs are also contributing to the shaping of the generating AP and that these channels are activated by Ca<sup>2+</sup> influx via Na<sub>v</sub>1.2. Since Na<sub>v</sub>1.2 is also permeable to Ca<sup>2+</sup> and it

was reported that  $\text{Na}_v1.2$  mediates  $\text{Ca}^{2+}$  influx in the AIS during APs [12], we next investigated this phenomenon in detail using hwtx.

### **$\text{Na}_v1.2$ mediates $\text{Ca}^{2+}$ influx associated with the AP in the AIS**

To investigate  $\text{Ca}^{2+}$  influx and currents associated with an AP in the AIS, we recorded  $\text{Ca}^{2+}$  fluorescence from the indicator Oregon Green BAPTA-5N (OG5N) and estimated the  $\text{Ca}^{2+}$  current waveform by calculating the time derivative of the fluorescence transient [17]. Specifically, we fitted the fluorescence transient with a 4-sigmoid fit and calculated its time-derivative as done in a previous study [18]. An example of this type of measurement is reported in Fig. 3a. As already reported by Hanemaaijer et al. [12], the kinetics of the  $\text{Ca}^{2+}$  signal associated with the AP varied with the distance from the soma with the onset of the  $\text{Ca}^{2+}$  transient in the distal axon preceding that in the proximal axon. This signal translated in a substantial delay between the peak of the  $\text{Ca}^{2+}$  current in the distal axon occurring before the peak of the somatic AP, and the peak of the  $\text{Ca}^{2+}$  in the proximal part of the AIS occurring after the peak of the somatic AP (Fig. 3b). This behaviour was consistently observed in  $N = 61$  cells tested in this way (Fig. 3b), with a significant delay between the peaks of the distal and the proximal  $\text{Ca}^{2+}$  currents of  $402 \pm 177 \mu\text{s}$  ( $p < 0.01$ , paired t-test). The evident anticipation of the AP peak, also with respect to the somatic AP peak, suggests that the  $\text{Ca}^{2+}$  influx associated with the AP is mainly mediated by VGNCs in the distal axon, whereas it is mainly mediated by VGCCs in the proximal axon. To address this hypothesis, we assessed the effect of locally delivering 80 nM hwtx on the  $\text{Ca}^{2+}$  influx and current associated with the AP in the AIS. In the example of Fig. 3c, hwtx substantially decreased the distal  $\text{Ca}^{2+}$  influx and current associated with the AP, whereas it only slightly decreased the proximal  $\text{Ca}^{2+}$  influx. To compare the effects of partially blocking  $\text{Na}_v1.2$  with those produced by blocking VGCCs, we first analysed the effects of inhibiting individual types of VGCCs. In detail, we blocked L-type VGCCs with 20  $\mu\text{M}$  isradipine, P/Q-type VGCCs with 1  $\mu\text{M}$   $\omega$ -agatoxin-IVA, N-type VGCCs with 1  $\mu\text{M}$   $\omega$ -conotoxin-GVIA, R-type VGCCs with 1  $\mu\text{M}$  of SNX482, and T-type VGCCs with 5  $\mu\text{M}$  ML218 and 30  $\mu\text{M}$  NNC550396. The results of this accurate analysis, reported in Supplementary Fig. S3, indicate that all types of VGCCs, at different extent, contribute to the axonal  $\text{Ca}^{2+}$  influx and current associated with the AP. Thus, to assess the effect of blocking all VGCCs, we locally delivered a cocktail with all inhibitors tested, at the same concentrations. In the example of Fig. 3d, the block of VGCCs substantially decreased the proximal  $\text{Ca}^{2+}$  influx and current associated with the AP, whereas the decrease of the distal  $\text{Ca}^{2+}$  current was only comparable to that produced by local delivery of 80 nM hwtx. We then compared the analysis of the change of the  $\text{Ca}^{2+}$  current peak in  $N = 8$  cells where the effect of locally delivering hwtx was tested, and in  $N = 8$  cells where the effect of locally delivering the VGCC blockers cocktail was tested (Fig. 3e). Whereas the partial block of  $\text{Na}_v1.2$  produced a marginal decrease of  $\sim 10\%$  of the  $\text{Ca}^{2+}$  current in the proximal AIS, compared to the significant decrease of  $>60\%$  produced by blocking VGCCs ( $p < 0.01$ , paired t-test), in the distal AIS hwtx and VGCCs blockers produced a similar and significant decrease of the  $\text{Ca}^{2+}$  current ( $p < 0.01$ , paired t-test). In summary, the reduction of  $\sim 26\%$  of the distal  $\text{Ca}^{2+}$  current (Fig. 3e) and the block of 30-40%  $\text{Na}_v1.2$  produced by locally delivering 80 nM hwtx are consistent with a scenario where  $\sim 70\%$  of the  $\text{Ca}^{2+}$  influx associated with the AP, at distal sites of the AIS, is mediated by  $\text{Na}_v1.2$ . The block of 30-40%  $\text{Na}_v1.2$  can therefore reduce the  $\text{K}^+$  current mediated by CAKCs widening the AP waveform at distal sites (Fig. 2).

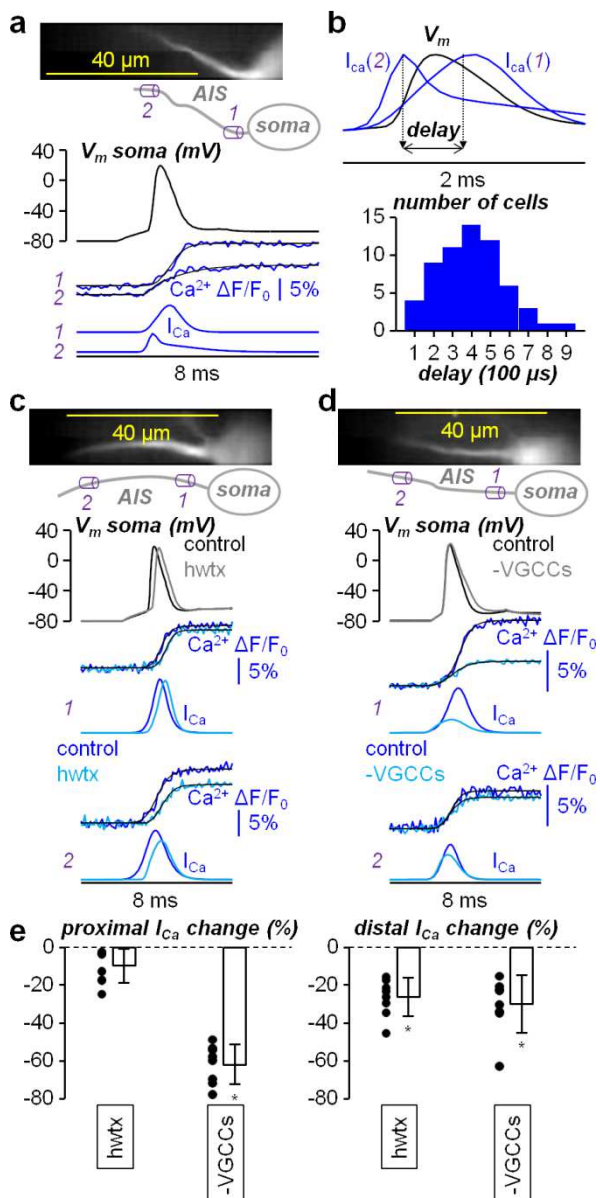

**Fig. 3 | Effect of hwtx (block of Nav1.2) on the  $\text{Ca}^{2+}$  influx in the AIS.** **a**, Top, fluorescence image ( $\text{Ca}^{2+}$  indicator OG5N) of the AIS and its reconstruction with a proximal region (1) and a distal region (2) indicated. Bottom, somatic AP and associated  $\text{Ca}^{2+}$  transients fitted with a 4-sigmoid (product of four sigmoids) function in 1 and 2; the  $\text{Ca}^{2+}$  currents calculated as the time-derivative of the fits are reported below. **b**, Top, from the experiment in a,  $\text{Ca}^{2+}$  currents superimposed to the somatic AP. Bottom, over  $N = 61$  cells tested, distribution of the delay between the distal and the proximal  $\text{Ca}^{2+}$  current peaks. **c**, Top,  $\text{Ca}^{2+}$  fluorescence image of the AIS and its reconstruction with a proximal region (1) and a distal (2) region indicated. Bottom, somatic AP and associated  $\text{Ca}^{2+}$  transients and currents in control solution and after local delivery of 80 nM of hwtx (top) 1 and 2. **d**, In another cell, same protocol as that reported in panel c, but with local delivery of a cocktail blocking all VGCCs (-VGCCs) comprising 20  $\mu\text{M}$  isradipine (L-type), 1  $\mu\text{M}$   $\omega$ -agatoxin-IVA (P/Q-type), 1  $\mu\text{M}$   $\omega$ -conotoxin-GVIA (N-type), 1  $\mu\text{M}$  SNX482 (R-type), 5  $\mu\text{M}$  ML218 + 30  $\mu\text{M}$  NNC550396 (T-type). **e**, Left, single values and percentage change of the proximal  $\text{Ca}^{2+}$  current peak after addition of hwtx ( $N = 8$  cells, mean  $\pm$  SD =  $-9.7 \pm 8.9$ ) or after addition of VGCCs blockers ( $N = 8$  cells, mean  $\pm$  SD =  $-62.2 \pm 10.5$ ). Right, in the same cells, single values and percentage change of the distal  $\text{Ca}^{2+}$  current peak after addition of hwtx (mean  $\pm$  SD =  $-26.2 \pm 10.1$ ) or after addition of VGCCs blockers (mean  $\pm$  SD =  $-30.0 \pm 15.1$ ). "\*" indicates a significant change ( $p < 0.01$ , paired t-test).

### The block of BK CAKCs widens the AP in the AIS preventing the widening caused by blocking $\text{Na}_v1.2$

In keeping with the results reported in Fig. 3, we next assessed the regulation of the AP waveform by individual CAKCs. In the example of Fig. 4a, locally delivering 1  $\mu\text{M}$  of the SK CAKC inhibitor apamin widened the AP waveform in the soma and in the proximal and distal sites of the AIS. Visually, this widening was larger towards the late phase of the repolarisation. Similarly, in the example of Fig. 4b, locally delivering 1  $\mu\text{M}$  of the BK CAKC inhibitor iberiotoxin also widened the somatic and axonal AP waveforms, but in this case the widening was observed earlier during the repolarisation. The widening behaviours produced by apamin or iberiotoxin were consistently observed in all cells tested. In contrast, the effects produced by 1  $\mu\text{M}$  of the IK CAKC inhibitor tram-34 were variable. In the example of Supplementary Fig. S4a, locally delivering tram-34 did not change the AP waveforms in the soma and at all sites of the AIS, but in 4/8 cells tested in this way a widening behaviour like that produced by apamin was observed, as indicated by the analysis of the  $\dot{V}_m$  signal (see Fig. 2b) reported in Supplementary Fig. S4b. Since the effect of blocking IK channels was variable, we conducted a further analysis on SK and BK CAKCs only. To see whether a  $\text{Ca}^{2+}$  source activates a particular CAKC, one can block only this particular  $\text{Ca}^{2+}$  source and see whether this block



prevents the effects produced by CAKCs. Thus, we first tested the combination of VGCCs as  $\text{Ca}^{2+}$  source by using the cocktail of blockers already used in the experiments of Fig. 3. In the example of Fig. 4c, we first blocked VGCCs, observing a widening of the AP waveform in the soma and in the proximal and distal sites of the AIS, and then added apamin to the VGCCs blockers cocktail. The block of SK CAKCs did not further change the somatic and axonal AP waveforms once VGCCs were blocked. In contrast, in the example of Fig. 4d, after observing a widening of the somatic and axonal AP waveforms produced by blocking VGCCs, addition of iberiotoxin caused a further widening of the  $V_m$  signals. The quantitative assessment of the effects of apamin and iberiotoxin was done in four separate groups of 7 cells in which the two inhibitors were tested first in control conditions and then after blocking VGCCs. In control conditions, the delivery of these inhibitors produced a significant increase of the  $\int V_m$  signal ( $p < 0.01$ , paired t-test), that was larger at distal sites of the AIS for iberiotoxin (Fig. 4d). The widening effects produced by apamin were similar to those produced by blocking VGCCs ( $N = 14$  cells). When VGCCs were previously blocked, however, further addition of apamin did not change the  $\int V_m$  signal (Fig. 4e). In contrast, further addition of iberiotoxin increased the  $\int V_m$  signal, in a significant manner ( $p < 0.01$ , paired t-test), by ~12% at the proximal AIS sites and by ~21% at the distal AIS sites (Fig. 4e). We concluded that SK CAKCs are activated exclusively by VGCCs, whereas BK CAKCs are also activated by other  $\text{Ca}^{2+}$  sources. Thus, to finally establish whether BK CAKCs are the target of  $\text{Ca}^{2+}$  entering through  $\text{Na}_v1.2$ , we measured the change in the AP waveform produced by locally delivering 80 nM hwtx, in the presence of 1  $\mu\text{M}$  iberiotoxin. In contrast to the cell of Fig. 2a-b where hwtx was applied in control solution, in the cell of Fig. 5a hwtx local delivery did not change the  $\int V_m$  signals. In this final quantitative assessment performed in a group of 7 cells (Fig. 5b), addition of hwtx in the presence of iberiotoxin did not change the  $\int V_m$  signal, in contrast to the increase of the  $\int V_m$  signal observed without iberiotoxin. This result indicates that the block of BK CAKCs prevents the widening of the AP waveform, in the AIS, produced by the block of  $\text{Na}_v1.2$ . We concluded that the  $\text{Na}_v1.2$   $\text{Ca}^{2+}$  influx targets BK CAKCs, in this way shaping the AP waveform at its generating site.

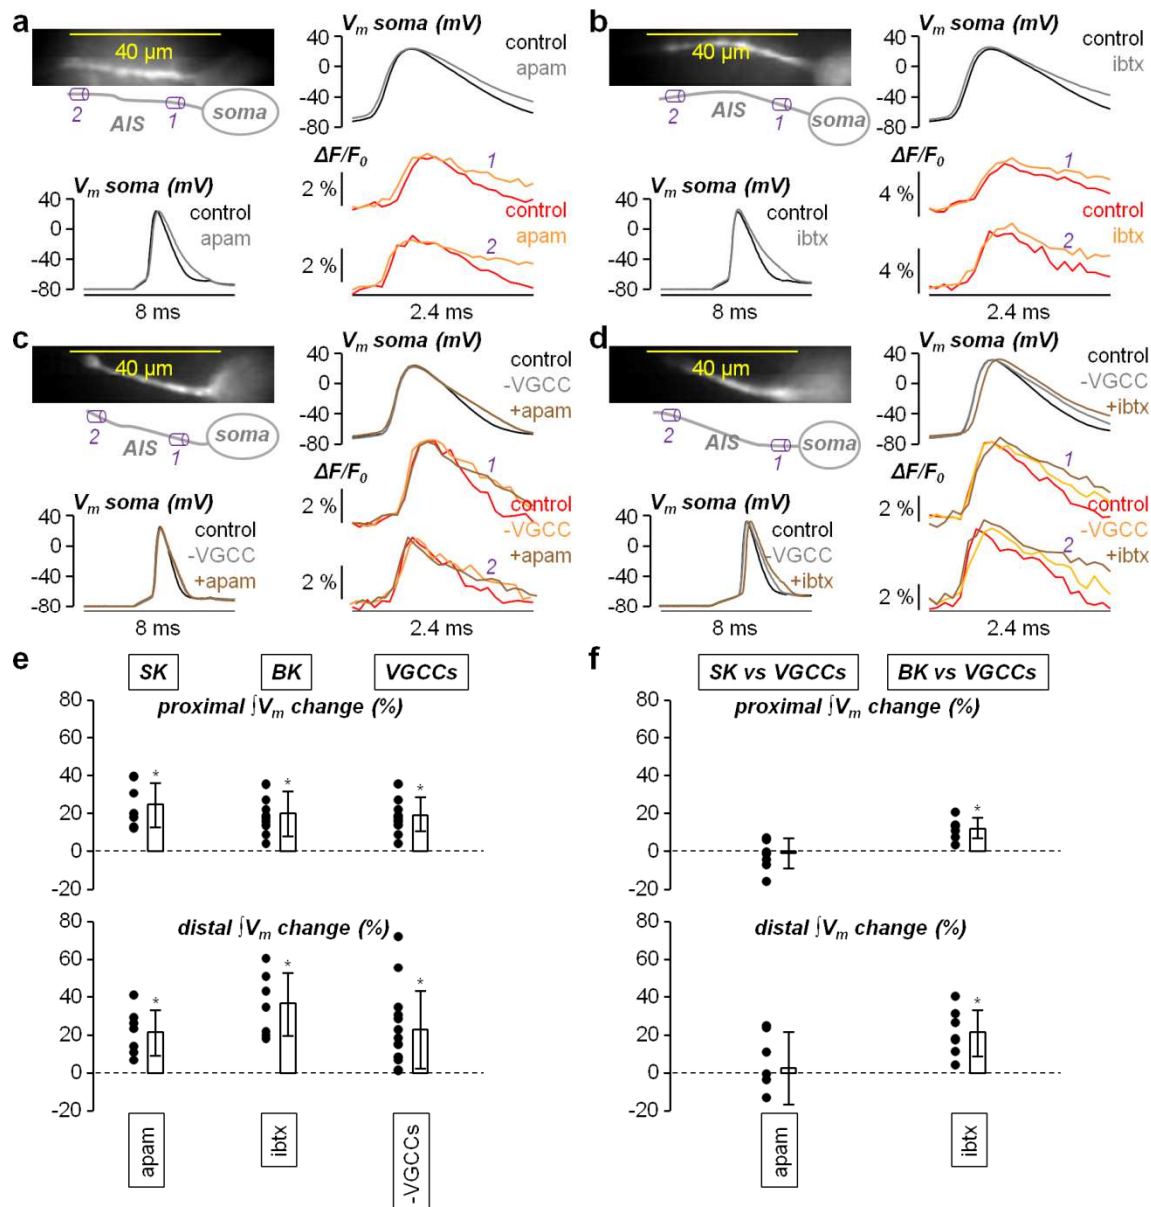

**Fig. 4 | Effect of blocking SK CAKCs or BK CAKCs on the AP waveform in the AIS.** **a**, Left, fluorescence image (JPW1114) of the AIS and its reconstruction with a proximal region (1) and a distal (2) region indicated; somatic AP before and after locally delivering 1 μM of the SK CAKC inhibitor apamin (apam) reported below. Right, somatic AP in control solution and after apamin delivery and associated V<sub>m</sub> transients in 1 and 2. **b**, In another cell, same protocol of panel a but by locally delivering 1 μM of the BK CAKC inhibitor iberiotoxin (ibtx). **c**, In another cell, same protocol of panel a but by sequentially blocking first VGCCs only and then VGCCs and SK CAKCs with additional apamin. **d**, In another cell, same protocol of panel a but by sequentially blocking first VGCCs only and then VGCCs and BK CAKCs with additional iberiotoxin. **e**, Top, single values and percentage change of the proximal ΔF/F<sub>0</sub> signal maximum (see analysis in Fig. 2) after delivering apamin (N = 7 cells, mean ± SD = 24.7 ± 11.7), iberiotoxin (N = 7 cells, mean ± SD = 20.1 ± 11.9) or the cocktail of VGCCs blockers (N = 14 cells, mean ± SD = 19.0 ± 8.9). Bottom, in the same cells, single values and percentage change of the distal ΔF/F<sub>0</sub> signal maximum after delivering apamin (mean ± SD = 21.7 ± 12.0), iberiotoxin (mean ± SD = 36.9 ± 16.6) or the cocktail of VGCCs blockers (mean ± SD = 22.9 ± 20.5). **f**, Top, with respect to the block of VGCCs, single values and percentage change of the proximal ΔF/F<sub>0</sub> signal maximum after delivering apamin (N = 7 cells, mean ± SD = -2.1 ± 7.9) or iberiotoxin (N = 7 cells, mean ± SD = 12.1 ± 5.4). Bottom, in the same cells, single values and percentage change of the distal ΔF/F<sub>0</sub> signal maximum after delivering apamin (mean ± SD = 2.4 ± 19.1) or iberiotoxin (mean ± SD = 21.5 ± 12.2). "\*\*\* indicates a significant change (p < 0.01, paired t-test).

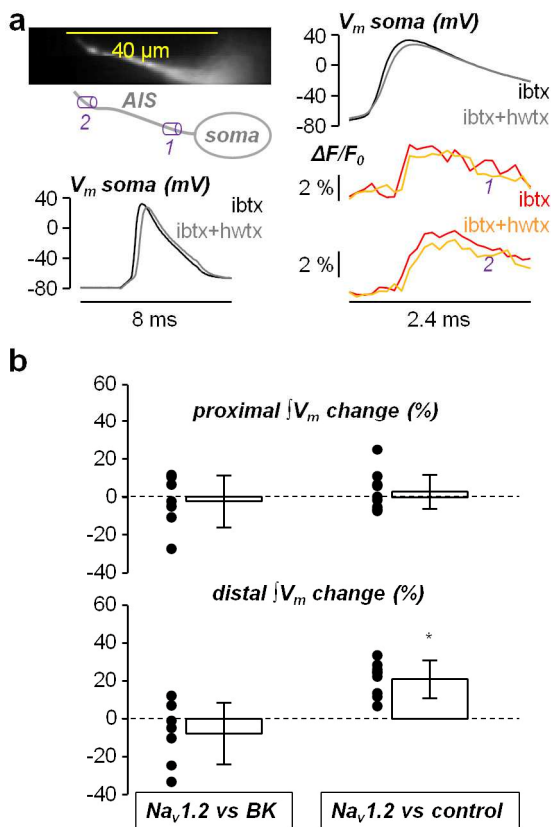

**Fig .5 | Effect of hwtx on the AP waveform in the AIS after blocking BK channels. a**, Left, fluorescence image (JPW1114) of the AIS and its reconstruction with a proximal region (1) and a distal region (2) indicated; somatic AP before and after locally delivering 80 nM hwtx in the presence of iberitoxin (1  $\mu$ M) reported below. Right, somatic AP and associated  $V_m$  transients in 1 and 2 in the presence of iberitoxin before and after hwtx delivery. **b**, Single cell values and percentage change (N=7 cells) of the  $\int V_m$  signal maximum after locally delivering hwtx in the presence of iberitoxin in proximal regions (mean  $\pm$  SD =  $-2.3 \pm 13.8$ ), and in distal regions (mean  $\pm$  SD =  $-7.9 \pm 16.3$ ). The statistics of the  $\int V_m$  signal maximum after locally delivering hwtx in control solution (Fig. 2c) are also reported for comparison on the right. "\*" indicates a significant change ( $p < 0.01$ , paired t-test).

### **Na<sub>v</sub>1.6 does not mediate Ca<sup>2+</sup> influx associated with the AP in the AIS**

The experiments reported in Figs. 1-5 demonstrate that Na<sub>v</sub>1.2 in the AIS shapes the AP waveform during the rising phase, by providing a large fraction of the inward current, and in the falling phase by regulating the Ca<sup>2+</sup>-activated outward current. The other VGNC (Na<sub>v</sub>1.6) also contributes to the AP shaping by providing the other Na<sup>+</sup> inward current, but whether it also regulates the Ca<sup>2+</sup>-activated outward current remained to be established. In a final set of experiments, we addressed this question by performing the same tests we did with hwtx (Figs. 1-3), but in this case using the Na<sub>v</sub>1.6 inhibitor 4,9-anhydrotetrodotoxin (attx). This molecule exhibits moderate selectivity for Na<sub>v</sub>1.6 with respect to Na<sub>v</sub>1.2 as measured in HEK293 cells using automated patch clamp recordings (Supplementary Fig. S5). Specifically, at 10 nM and 33 nM, attx blocks  $20 \pm 13\%$  and  $30 \pm 13\%$  Na<sub>v</sub>1.6, respectively, whereas it blocks  $9 \pm 11\%$  and  $16 \pm 12\%$  Na<sub>v</sub>1.2 respectively. In AP tests performed in brain slices, attx at 400 nM did not affect the AP, whereas the smallest concentration at which we consistently observed a delay in the AP offset was 800 nM (Supplementary Fig. S5). At 1600 nM, attx consistently produced a stronger AP inhibition (Supplementary Fig. S5). Similarly to hwtx, the effects of attx at all concentrations were stable for several minutes after delivery. Thus, imaging experiments in brain slices were performed by using attx at the concentration of 800 nM providing the minimal perturbation of the somatic AP. Surprisingly, in the cell reported in Supplementary Fig. S6a, local delivery of 800 nM produced an increase of the distal Na<sup>+</sup> transient, associated with a large increase of the slow non-inactivating component of the Na<sup>+</sup> current (Supplementary Fig. S6b). A large increase of the Na<sup>+</sup> transient and of the  $I_{slow}$  at distal sites was observed in 4/8 tested with this protocol (Supplementary Fig. S6c), suggesting that attx slows down the kinetics of inactivation of VGNCs. Consistently with a variable modulation of the  $I_{slow}$ , attx also produced variable effects on the axonal AP waveform. While in the cell reported in Supplementary Fig. S7a-b the local delivery of attx did not change the AP waveform in the AIS, in the cell reported in

**Supplementary Fig. S7c-d** attx widened the AP at the distal site of the AIS. In  $N = 7$  cells tested with this protocol, the widening of the distal axonal AP was observed in 4 cells, whereas the AP waveforms did not change in 3 cells (**Supplementary Fig. S7e**). The complex interaction of attx with VGNCs does not allow the use of this tool to analyse in detail the role of  $\text{Na}_v1.6$ . Nevertheless, since attx prolongs the  $\text{Na}^+$  influx (**Supplementary Fig. S6a**), the  $\text{Ca}^{2+}$  influx should be also prolonged if the channel affected by attx is permeable to  $\text{Ca}^{2+}$ . In the cell of **Supplementary Fig. S8a**, however, the local delivery of attx did not change the axonal  $\text{Ca}^{2+}$  current and no significant change of the proximal or distal axonal  $\text{Ca}^{2+}$  current was measured in  $N = 7$  cells tested with this protocol (**Supplementary Fig. S8b**). Since  $\text{Na}_v1.2$  is permeable to  $\text{Ca}^{2+}$  (**Fig. 3**), this result indicates that attx affects the kinetics of inactivation of  $\text{Na}_v1.6$  in murine brain slices and that this VGNC isoform is not contributing to the early  $\text{Ca}^{2+}$  influx. We concluded that only  $\text{Na}_v1.2$  mediates  $\text{Ca}^{2+}$  influx during the generating AP in the AIS and that only this isoform is functionally coupled to BK CAKCs.

### **The $\text{Na}_v1.2$ -BK channels interaction is mimicked by simulations in a NEURON model**

To mimic the experimental AP generation in the AIS, we built a NEURON model on the base of our dataset. Starting from the model reported in Hallermann et al. [23] and already utilised in our previous article [15], we adapted the AIS morphology to the mouse L5 pyramidal neuron and replaced the  $\text{Na}_v1.2$  and  $\text{Na}_v1.6$  channel models with those proposed in Mainen et al. [28], distributed consistently with the results reported by Hu et al. [7] (see **Fig 6a**). From this starting model, we modified the channel functions, as described in the **Methods**, in order to match the experimental  $\text{Na}^+$  and  $V_m$  signals in the AIS. We then introduced  $\text{Ca}^{2+}$  permeability to  $\text{Na}_v1.2$  corresponding to 0.4% with respect to the permeability for  $\text{Na}^+$  (as suggested by Hanemaaijer et al. [12]) and we introduced a low voltage-activated VGCC (LVAC) and a high voltage-activated VGCC (HVAC). We introduced an endogenous  $\text{Ca}^{2+}$  buffer and, when matching  $\text{Ca}^{2+}$  imaging experiments only, a  $\text{Ca}^{2+}$  buffer corresponding to 2 mM OG5N. Finally, we introduced SK and BK CAKCs and we explicitly introduced a coupling between SK channels and LVGCCs as described in the **Methods**. The relative spatial distributions of VGNCs, VGCCs, BK and SK channels, reported in **Fig 6a**, were set in order to reproduce the experimental results. **Fig. 6b** shows the proximal and distal  $V_m$  waveforms, the  $\text{Na}^+$  transients and the  $\text{Ca}^{2+}$  transients obtained by running computer simulations with the NEURON model. To validate the ability of the model to match the experimental evidence, we simulated the block of 80% VGCCs, of 80% SK channels (experiments with apamin) or of 80% BK channels (experiments with iberiotoxin). As shown in **Fig 6c**, computer simulations qualitatively replicate the experimental changes of the AP shape reported in **Fig 4**, indicating that the model realistically reproduces the activation of CAKCs during the AP generation. Thus, we eventually mimicked the effect of hwtx to produce a partial block of  $\text{Na}_v1.2$ , that replicates the experimental shift of the AP with minimal change of the peak and the reduction of the global  $\text{Na}^+$  transient of ~30% (see **Fig.1**). As shown in **Fig 6d**, the simulation reproduces the experimental reduction of the  $\text{Na}^+$  and  $\text{Ca}^{2+}$  transients and, more importantly, the widening of the distal AP (see **Fig.2**). Thus, the NEURON model that we built predicts the interplay between  $\text{Na}_v1.2$  and BK CAKCs associated with the generation of the AP in the AIS and replicates, in a computer simulation, the experimental widening of the axonal AP produced by hwtx delivery.

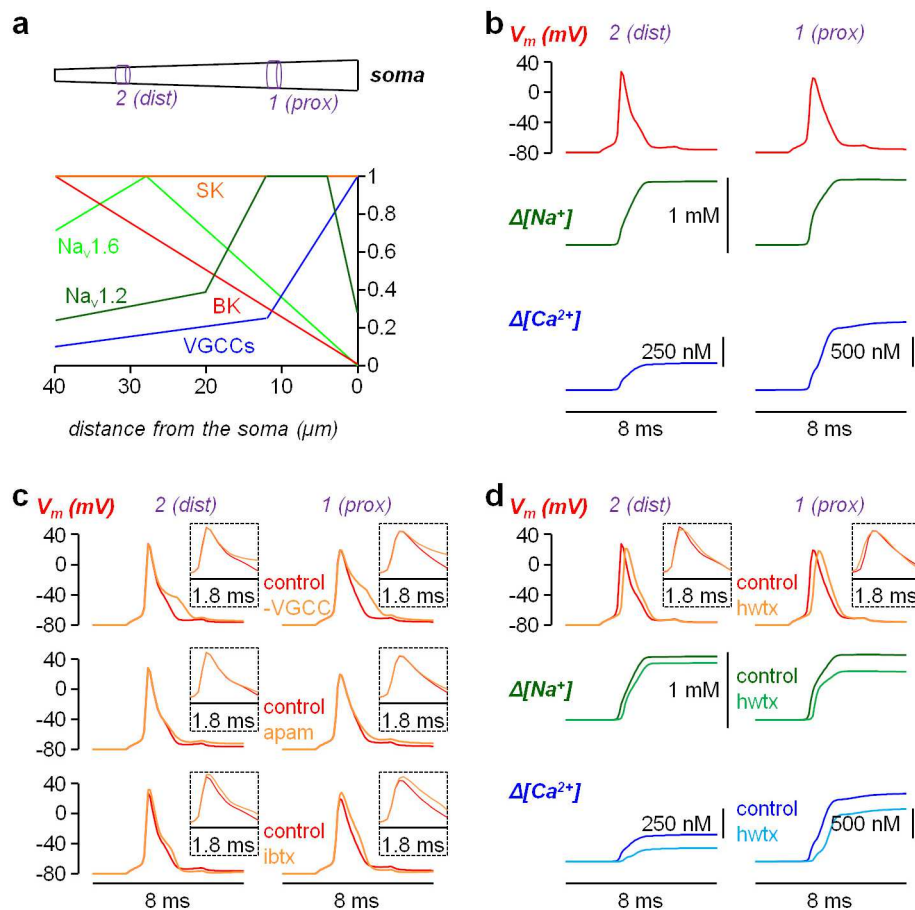

**Fig. 6 | NEURON simulations of the AP generation in the AIS.** **a**, Top, structure of the AIS (40  $\mu\text{m}$  long) with proximal (1) compartment and distal (2) compartment at 10-12  $\mu\text{m}$  and 30-32  $\mu\text{m}$  from the soma, respectively. Bottom, normalised distributions of  $\text{Na}_v1.2$  VGNCs (dark green),  $\text{Na}_v1.6$  VGNCs (light green), VGCCs (blue), SK CAKCs (orange) and BK CAKCs (red) along the AIS. **b**,  $V_m$  (AP waveform), free  $\text{Na}^+$  and free  $\text{Ca}^{2+}$  from a computer simulation of the NEURON model in the proximal and distal regions. The presence of OG5N was taken into account for the free  $\text{Ca}^{2+}$  estimate. **c**,  $V_m$  (AP waveform) from computer simulations of the NEURON model in the proximal and distal regions in control conditions and after mimicking the delivery of VGCCs blockers (80% VGCCs reduction, top trace), of apamin (80% SK CAKCs reduction, middle trace) or of iberiotoxin (80% BK CAKCs reduction, bottom trace). The changes of the AP waveform are reported in the insets. The simulations qualitatively reproduce the experimental results reported in Fig. 4. **d**,  $V_m$  (AP waveform), free  $\text{Na}^+$  and free  $\text{Ca}^{2+}$  from computer simulations of the NEURON model in the proximal and distal regions in control conditions and after mimicking the delivery of hwtx. The presence of OG5N was taken into account for the free  $\text{Ca}^{2+}$  estimate. The changes of the AP waveform are reported in the insets. The simulations qualitatively reproduce the experimental results reported in Figs. 1-3.

## Discussion

If co-expression of multiple isoforms of VGNCs occurs in the mammalian AIS, does each isoform carry one or more specific roles in the generation and propagation of the AP? In pyramidal neurons, the different temporal and spatial patterns of expression of  $\text{Na}_v1.2$  and  $\text{Na}_v1.6$ , but also the diverse biophysical properties underlying activation and inactivation, suggest that these two channels contribute differently to the generation/propagation of APs [7], as well as in the ability to mediate high or low frequency firing [8]. In this study we demonstrate that the exclusive permeability of  $\text{Na}_v1.2$  to  $\text{Ca}^{2+}$  [12] allows activation of BK CAKCs in



the AIS. In this way, the interplay between  $\text{Na}_v1.2$ , mediating the AP rise, and BK channels regulating the peak and the early phase of the AP repolarisation, shapes the AP waveform at the site of generation. To reach this important conclusion, we combined ultrafast imaging techniques with pharmacological analyses using selective channel blockers. The most important molecule used in this study was  $\text{G}^1\text{G}^4$ -huwentoxin-IV, mutated from huwentoxin-IV, a peptide from the Chinese bird spider *Haplopelma schmidti* [27]. Using this potent  $\text{Na}_v1.2$  inhibitor, sufficiently selective against  $\text{Na}_v1.6$ , we could block, in a reliable manner, 30-40% of  $\text{Na}_v1.2$  in the AIS of L5 pyramidal neurons. This permitted the detailed investigation of  $\text{Na}^+$  currents,  $V_m$  waveforms and  $\text{Ca}^{2+}$  currents, associated with the generating AP, in the AIS. We then analysed the change in AP waveform produced by selectively blocking different types of CAKCs, eventually establishing the interaction between  $\text{Na}_v1.2$  and BK channels. Notably, several other channels contribute to the early process of generation and propagation of the AP. Thus, we created a NEURON model that adds to previous models developed for the AIS of L5 pyramidal neurons [7, 12, 20-24] and that reproduces our experimental results. Using this model, we could simulate the functional interaction between  $\text{Na}_v1.2$  and BK channels and mimic the experimental results obtained by blocking  $\text{Na}_v1.2$  with  $\text{G}^1\text{G}^4$ -huwentoxin-IV.

The process of AP generation starts with a sub-threshold depolarisation that spreads from the soma (or physiologically from the dendrites through the soma) to the AIS. The observation of an early subthreshold component of the  $\text{Na}^+$  influx [15] indicates that VGNCs also contribute to amplify the axonal depolarisation before the AP onset [29]. Whereas the threshold for the AP initiation is largely determined by  $\text{Na}_v1.6$  [30], our results point for a major contribution of  $\text{Na}_v1.2$  in the  $\text{Na}^+$  current during the rising phase of the AP, in particular at its peak occurring at the AP upstroke, even in the distal sites of the AIS where  $\text{Na}_v1.6$  expression is dominant. Importantly, an early  $\text{Ca}^{2+}$  current occurring with kinetics similar to that of the  $\text{Na}^+$  current allows  $\text{Ca}^{2+}$  binding to its targets before the AP reaches its peak. This is crucial since BK CAKCs require concomitant  $\text{Ca}^{2+}$  binding and depolarisation in order to open [31]. At the peak of the AP, BK channels contribute to the total  $\text{K}^+$  current that counterbalances the non-inactivated  $\text{Na}^+$  current, together with the diverse voltage-gated  $\text{K}^+$  channels expressed in the AIS [32]. Thus, a decrease of the  $\text{Na}_v1.2$  current is counterbalanced by a decrease of the BK current, resulting in widening of the early phase of AP repolarisation with a modest change of the AP peak. The interplay between  $\text{Na}_v1.2$  and BK channels is therefore a major determinant of the AP peak and a key regulator of the AP shape. After the peak, other channels contribute to the shape of the AP repolarisation, in particular VGCCs and SK CAKCs. Our results also provide evidence of the precise role of these channels in the shaping of the AP.

The shape of the AP at its site of origin is the starting point of the consequent physiological processes occurring at the other sites of the cells. First, the AP waveform, modulated during propagation along the axons, regulates neurotransmitter release and therefore synaptic transmission at synaptic terminals, in this way providing an analogue component of the digital information process [33]. Second, the AP waveforms regulate neuronal firing. Interestingly, in CA1 hippocampal pyramidal neurons, it has been shown that BK CAKCs facilitate high-frequency firing and cause early spike frequency adaptation [34]. The regulation of the firing frequency is crucial for the coupling among the different sites of the cell that are believed to underlie conscious processing [35]. Specifically, in L5 pyramidal neurons, high-frequency bursts of APs back-propagate along the apical dendrite reaching the tuft and provoking  $\text{Ca}^{2+}$  electrogenesis [36]. Finally, neurons with sharper AP kinetics have been correlated with human individuals exhibiting high IQ scores [37].

The result reported in this study is therefore a potential interpretation key in the investigation of the variety of neurological disorders associated with critical mutations of Na<sub>v</sub>1.2 [38,39] or BK channels [40]. Among the hundreds of mutations of the *SCN2A* gene, encoding Na<sub>v</sub>1.2, those classified as “gain of function” are typically associated with mild epilepsy [41], or with severe epileptic encephalopathies [42]. These phenotypes are generally explained by an enhancement of activity of glutamatergic neurons, despite Na<sub>v</sub>1.2 is also expressed in GABAergic interneurons [43]. The range of neurological disorders associated with other Na<sub>v</sub>1.2 mutations is far more complex, including autism and intellectual disability [38]. In parallel, heterogeneous combinations of disorders including seizure and intellectual disability are associated with mutations of *KCNMA-1*, the gene encoding BK channels [40]. Thus, the functional link between Na<sub>v</sub>1.2 and BK channels can represent an element to unravel the complexity of these channelopathies using murine models. In a heterozygote *SCN2A* knock-out mouse, haploinsufficiency of Na<sub>v</sub>1.2 is associated with an autistic-like phenotype attenuated with age [44], but in another *SCN2A*<sup>+/-</sup> model the phenotype is also characterized by epileptic seizures [45] consistent with hyperexcitability of L5 pyramidal neurons [46]. More recently, a mouse model carrying the K1422A mutation in the *SCN2A* gene has been generated [47]. This specific mutation is characterised by an increase in Ca<sup>2+</sup> permeability of Na<sub>v</sub>1.2 and a mix of phenotypes including rare seizures. This is an example where the result reported in the present study can represent an important interpretation key to link the cellular mechanisms to the behavioural dysfunction in the mouse model.

## Methods

### Selectivity tests of G<sup>1</sup>G<sup>4</sup>-huwentoxin-IV (hwtx) and of 4,9-Anhydrotetrodotoxin (atx)

Preliminary data on G<sup>1</sup>G<sup>4</sup>-huwentoxin-IV (hwtx), without the analysis on its selectivity, were previously reported [48]. Tests of the selectivity of hwtx and atx were performed on HEK293 cells stably expressing either Na<sub>v</sub>1.2 or Na<sub>v</sub>1.6 channels as described in a previous report [49]. Automated patch-clamp recordings in whole-cell configuration were performed using the SyncroPatch 384PE from Nanion (München, Germany). Chips with single-hole medium resistance of 4.52 ± 0.08 MΩ (N = 384 experiments) were used for recordings. Pulse generation and data collection were performed with the PatchControl384 v1.5.2 software (Nanion) and the Biomek v1.0 interface (Beckman Coulter). The intracellular solution contained (in mM): 10 CsCl, 110 CsF, 10 NaCl, 10 EGTA and 10 HEPES (pH 7.2, osmolarity 280 mOsm). The extracellular solution contained (in mM): 140 NaCl, 4 KCl, 2 CaCl<sub>2</sub>, 1 MgCl<sub>2</sub>, 5 glucose and 10 HEPES (pH 7.4, osmolarity 298 mOsm). Voltage clamp experiments were performed at a holding potential of -100 mV at room temperature (18-22°C) and currents were sampled at 20 kHz. Each peptide was prepared in the extracellular solution supplemented with 3% BSA and a single peptide concentration was applied to each cell. For establishing dose-response curves, the compounds were tested at a test potential of 0 mV for 50 ms with a pulse every 5 sec. The percentage of current inhibition by the peptides was measured at equilibrium of blockage or at the end of a 14-min application time. Notice that the peptide used in this study (hwtx) was different from the active toxin in the caged compound described in our previous publication [49].

## Brain slices solution, preparation and maintenance

Experiments in brain slices were performed at the Laboratory of Interdisciplinary Physics in Grenoble in accordance with European Directives 2010/63/UE on the care, welfare and treatment of animals. Procedures were reviewed by the ethics committee affiliated to the animal facility of the university (D3842110001). The extracellular solution that we used contained (in mM): 125 NaCl, 26 NaHCO<sub>3</sub>, 1 MgSO<sub>4</sub>, 3 KCl, 1 NaH<sub>2</sub>PO<sub>4</sub>, 2 CaCl<sub>2</sub> and 20 glucose, bubbled with 95% O<sub>2</sub> and 5% CO<sub>2</sub>. Mice (C57BL/6j, 21-35 postnatal days old) purchased from Janvier Labs (Le Genest-Saint-Isle, France) were anesthetised by isoflurane inhalation and the entire brain was removed after decapitation. Brain slices (350 µm thick) were prepared using the procedure described in a previous report [15], using a Leica VT1200 vibratome (Wetzlar, Germany). Slices were incubated at 37°C for 45 minutes and maintained at room temperature before use.

## Electrophysiology and imaging in brain slices

Slices with L5 pyramidal neurons in the somato-sensory cortex having an axon parallel to the slice surface were transferred to the recording chamber. Patch-clamp recordings were made at the temperature of 32-34°C using a Multiclamp 700A (Molecular Devices, Sunnyvale, CA). The intracellular solution contained (in mM): 125 KMeSO<sub>4</sub>, 5 KCl, 8 MgSO<sub>4</sub>, 5 Na<sub>2</sub>-ATP, 0.3 Tris-GTP, 12 Tris-Phosphocreatine, 20 HEPES, adjusted to pH 7.35 with KOH. In Na<sup>+</sup> imaging experiments, the Na<sup>+</sup> indicator ING-2 (IonBiosciences, San Marcos, TX) was added to the intracellular solution at the concentration of 0.5 mM and recordings were started 20 minutes after achieving the whole cell configuration. In V<sub>m</sub> imaging experiments, cell membranes were loaded with the voltage-sensitive dye D-2-ANEPEQ (JPW1114, 0.2 mg/mL, Thermo Fisher Scientific) for 30 minutes using a first patch clamp recording and then re-patched a second time with dye free solution. Finally, in Ca<sup>2+</sup> imaging experiments, the Ca<sup>2+</sup> indicator Oregon Green BAPTA-5N (Thermo Fisher Scientific) was added to the intracellular solution at the concentration of 2 mM and recordings were started 20 minutes after achieving the whole cell configuration. Somatic APs were elicited in current clamp mode by short current pulses of 1.5-2.5 nA through the patch pipette electrical and electrical signals were acquired at 20 kHz. The bridge was corrected offline by using the recorded injected current and the measured V<sub>m</sub> was corrected for -11 mV junction potential. Na<sup>+</sup> and Ca<sup>2+</sup> imaging experiments and most of V<sub>m</sub> imaging experiments were performed using an imaging system described in a previous report [15], based on an upright Scientifica SliceScope microscope equipped with a motorised XY translation stage and PatchStar manipulators (Scientifica, Uckfield, UK), and a 60X Olympus water immersion objective (NA = 1). Na<sup>+</sup> and V<sub>m</sub> indicators were excited using the 520 nm line of a LaserBank (Cairn Research, Faversham, UK) band-pass filtered at 517 ± 10 nm and directed to the preparation using a 538 nm long-pass dichroic mirror. The Ca<sup>2+</sup> indicator was excited using the 465 nm line of the LaserBank, band-pass filtered at 469 ± 17 nm and directed to the preparation using a 495 nm long-pass dichroic mirror. Na<sup>+</sup> and V<sub>m</sub> fluorescence emission signals were band-pass filtered at 559 ± 17 nm or long-pass filtered at >610 nm respectively. Ca<sup>2+</sup> fluorescence emission was band-pass filtered at 525 ± 25 nm. The size of the illumination spot, obtained using a custom-made telescope, was ~30 µm. Image sequences were demagnified by 0.5X and acquired with a DaVinci 2K CMOS camera (SciMeasure, Decatur, GA) at 10 kHz with a pixel resolution of 500 nm in regions of 30X128 pixels. The other V<sub>m</sub> imaging experiments were performed using an imaging system described in a previous report [25]. Fluorescence was excited using the 530 nm line of LDI-7 laser (89 North, Williston, VT), band-pass

filtered at  $531 \pm 40$  nm and directed to the preparation using a 575 nm long-pass dichroic mirror. Fluorescence emission was long-pass filtered at  $>610$  nm and acquired with a NeuroCCD camera (Redshirt Imaging, Decatur, GA) at 20 kHz with a pixel resolution of  $\sim 2$   $\mu\text{m}$  in regions of 4X26 pixels. In all experiments, image sequences were acquired for 8 ms.

## Pharmacology

All molecules were initially dissolved in stock solutions and small aliquots were kept at  $-20$  °C before use.  $G^1G^4$ -huwentoxin-IV (hwtx) was synthesised by Smartox Biotechnology (Saint Egrève, France).  $\omega$ -agatoxin-IVA (agalVA),  $\omega$ -conotoxin-GVIA (conGVIA), snx482, apamin (apam) and iberiotoxin (ibtX) were also purchased from Smartox Biotechnology. 4,9-Anhydrotetrodotoxin (attx) was purchased from Tocris (Bristol, UK). Tram-34 (tram) was purchased from HelloBio (Bristol, UK). All these molecules were initially dissolved in water at 100  $\mu\text{M}$  concentration and then diluted in external solution at the desired concentration. 4-(2,1,3-Benzoxadiazol-4-yl)-1,4-dihydro-2,6-dimethyl-3,5-pyridinecarboxylic acid methyl 1-methylethyl ester (isradipine or isr) (HelloBio) was initially dissolved at 20 mM in DMSO and then diluted in external solution 20  $\mu\text{M}$  just before use. This final solution was kept for a maximum of 1h to prevent the loss of dissolved molecules due to precipitation. 3,5-dichloro-*N*-[[[(1 $\alpha$ ,5 $\alpha$ ,6-exo,6 $\alpha$ )-3-(3,3-dimethylbutyl)-3-azabicyclo[3.1.0]hex-6-yl]methyl]-benzamide-hydrochloride (ML218 or ml) was purchased from TOCRIS and initially dissolved at 50 mM in DMSO. (1*S*,2*S*)-2-[2-[[3-(1*H*-Benzimidazol-2-yl)propyl]methylamino]ethyl]-6-fluoro-1,2,3,4-tetrahydro-1-(1-methylethyl)-2-naphthalenyl-cyclopropanecarboxylate-dihydrochloride (NNC550396 or nnc) was purchased from TOCRIS and initially dissolved at 25 mM in water. These two molecules were diluted together in external solution at the desired concentrations. The protocol to locally deliver the channel blockers is illustrated in [Supplementary Fig. S2a](#).

## Data analysis

All data, from averages of 4 trials with identical somatic response, were analysed using custom-written code written in MATLAB. Initially, recordings including an AP were corrected for photo-bleaching using multi-exponential fits of fluorescence transients in single trials without an AP. Then, the fractional change of fluorescence from the first image ( $\Delta F/F_0$ ) was calculated over the mean fluorescence in 5  $\mu\text{m}$  regions at proximal and distal locations of the AIS ([Supplementary Fig. S2b](#)). For  $\text{Na}^+$  imaging experiments, the  $\text{Na}^+$  current was calculated as described in detail in a previous report [15]. Specifically,  $\Delta F/F_0$  signals were initially converted into  $\Delta[\text{Na}^+]$  signals and then into a  $\text{Na}^+$  (or a positive charge) superficial density using an estimate of the diameter of the axon. The signal was fitted with a model function (see [15]) and the current surface density (or simply the current) was finally obtained by calculating the time derivative of this fit. In the analysis, a fast ( $I_{\text{fast}}$ ) and a slow ( $I_{\text{slow}}$ ) of the  $\text{Na}^+$  current were extracted (see [Fig. 1b](#)). For  $V_m$  imaging experiments, to unambiguously quantify a change in AP beyond the noise of the optical recording, we calculated the integral of the  $\Delta F/F_0$  signal over a time window of 2.4 ms comprising the AP. For  $\text{Ca}^{2+}$  imaging experiments, the  $\text{Ca}^{2+}$  current was calculated as described in detail in a previous report [18]. Specifically,  $\Delta F/F_0$  signals were fitted with a model function consisting on the product of four sigmoid functions and the current was obtained by calculating the time derivative of this fit.

## Statistics

The effect of a channel blocker on a specific signal was quantified by computing its percentage change following local delivery of the blocker with respect to the control condition. To assess the consistency of the effect, for each protocol and in at least seven cells and we performed a paired t-test comparing the values in control conditions and the values after local delivery of the channels blocker. We considered 0.01 as the threshold to describe an effect as significant.

## NEURON model

The NEURON model, built from the starting model reported in Hallermann et al. [23] (adapted for the mouse) and already utilised in our previous article [15], was developed by replicating the results of the computer simulations with  $V_m$ ,  $\text{Na}^+$  and  $\text{Ca}^{2+}$  imaging results from three cells where the somatic AP had very similar shape. The AIS (40  $\mu\text{m}$  long) has semi-conical shape with initial diameter of 4.22  $\mu\text{m}$  and final diameter of 1.73  $\mu\text{m}$  and it is divided in 20 compartments of 2  $\mu\text{m}$  length. We took the 6<sup>th</sup> compartment (10-12  $\mu\text{m}$  from the soma) as representative of the proximal AIS and the 16<sup>th</sup> compartment (30-32  $\mu\text{m}$  from the soma) as representative of the distal AIS. The construction of the new model, from the initial basic model, was achieved through a strategy consisting in a sequence of steps.

1. First, we replaced the two generic VGNCs with the  $\text{Na}_v1.2$  and  $\text{Na}_v1.6$  channel models proposed in Mainen et al. [28], imposing the distribution of the initial model also consistent with the results reported in Hu et al. [7]. The functions and distributions of both channels were then optimised in order to take into account the different activation and inactivation kinetics to match the experimental  $\text{Na}^+$  transients both in the proximal and in the distal parts of the AIS.
2. Second, we introduced  $\text{Ca}^{2+}$  permeability to  $\text{Na}_v1.2$  corresponding to 0.4% with respect to the permeability for  $\text{Na}^+$  (as suggested by Hanemaaijer et al. [12]), a LVAC, corresponding to T-type channels, and a HVAC, corresponding to the ensemble of L-type, P/Q-type, N-type and R-type channels. The two models were adopted from a model in Almog and Korngreen [50]. The channel distribution and density were set to match the results of the  $\text{Ca}^{2+}$  imaging experiment. The distribution of VGCCs was also consistent with the results reported by another laboratory [51]. In the simulations used to match experimental  $\text{Ca}^{2+}$  transients, we introduced a generic mobile  $\text{Ca}^{2+}$  buffer with standard kinetics [52] to mimic 2 mM OG5N in the patch pipette. In all simulations, we accounted for an immobile endogenous buffer with capacity of  $\sim 40$  in the distal AIS, consistent with estimates at presynaptic sites [53]. Finally, for  $\text{Ca}^{2+}$  extrusion and  $\text{Ca}^{2+}$  radial/longitudinal diffusion, we used the model proposed in Kim et al. [54].
3. Third, we modified the  $\text{K}^+$  channels from the initial model in the following manner. We introduced the inward rectifier  $\text{K}^+$  channels from Migliore et al. [55], the BK CAKS from Ait Ouares et al [25], the SK CAKC from Mahapatra et al. [56], and we reduced the original  $\text{K}^+$  channels in order to preserve the kinetics of the AP in the AIS under control conditions. In addition, we explicitly made SK channels activation dependent on  $\text{Ca}^{2+}$  entering from LVGCCs. These modified profile of  $\text{K}^+$  channels produced AP waveforms qualitatively consistent with the experimental results shown in Fig.4, when 80% of VGCCs, BK channels or SK channels were eliminated from the model (see simulations in Fig.6c).



With this model, we finally mimicked the delivery of 80 nM hwtx by changing the  $\text{Na}_v1.2$  function in order to obtain a reduction of the  $\text{Na}^+$  transients in the proximal and distal AIS consistent with the experiments reported in [Fig.1](#). This was done by a full block of a non inactivating component of the  $\text{Na}_v1.2$  current, a 20% reduction of a fast inactivating component of the  $\text{Na}_v1.2$  current, a 6% reduction of the activation slope of the  $\text{Na}_v1.2$  current and a 50% reduction of the  $\text{Ca}^{2+}$  permeability.

## Data availability

The complete dataset of imaging/electrophysiological experiments in brain slices, used in this study, is available in the public repository Zenodo (doi: 10.5281/zenodo.5835995). The Neuron model, including the changes of parameters replicating the experiments with hwtx are available in the NeuronDB database at: <http://modeldb.yale.edu/267355>.

## Code availability

Matlab codes used for data analysis are available at <https://github.com/MarcoCanepari/NAV12-BK-paper>.

## References

- [1] Leterrier, C. The Axon Initial Segment, 50Years Later: A Nexus for Neuronal Organization and Function. *Curr. Top. Membr.* **77**, 185-233 (2016). doi: [10.1016/bs.ctm.2015.10.005](https://doi.org/10.1016/bs.ctm.2015.10.005).
- [2] Rama, S., Zbili, M. & Debanne, D. Signal propagation along the axon. *Curr. Opin. Neurobiol.* **51**, 37-44 (2018). doi: [10.1016/j.conb.2018.02.017](https://doi.org/10.1016/j.conb.2018.02.017).
- [3] Gulledge, A.T., Kampa, B.M. & Stuart, G.J. Synaptic integration in dendritic trees. *J. Neurobiol.* **64**, 75-90 (2005). doi: [10.1002/neu.20144](https://doi.org/10.1002/neu.20144).
- [4] Kole, M.H. & Stuart, G.J. Signal processing in the axon initial segment. *Neuron* **73**, 235-247 (2012). doi: [10.1016/j.neuron.2012.01.007](https://doi.org/10.1016/j.neuron.2012.01.007).
- [5] Bean, B.P. The action potential in mammalian central neurons. *Nat. Rev. Neurosci.* **8**, 451–465 (2007). doi: [10.1038/nrn2148](https://doi.org/10.1038/nrn2148).
- [6] Tian, C., Wang, K., Ke, W., Guo, H. & Shu, Y. Molecular identity of axonal sodium channels in human cortical pyramidal cells. *Front. Cell. Neurosci.* **8**, 297 (2014). doi: [10.3389/fncel.2014.00297](https://doi.org/10.3389/fncel.2014.00297).
- [7] Hu, W., Tian, C., Li, T., Yang, M., Hou, H. & Shu Y. Distinct contributions of Na(v)1.6 and Na(v)1.2 in action potential initiation and backpropagation. *Nat. Neurosci.* **12**, 996-1002 (2009). doi: [10.1038/nn.2359](https://doi.org/10.1038/nn.2359).
- [8] Rush, A.M., Dib-Hajj, S.D. & Waxman, S.G. Electrophysiological properties of two axonal sodium channels, Nav1.2 and Nav1.6, expressed in mouse spinal sensory neurones. *J. Physiol.* **564**, 803-815 (2005). doi: [10.1113/jphysiol.2005.083089](https://doi.org/10.1113/jphysiol.2005.083089).
- [9] Astman, N., Gutnick, M.J. & Fleidervish, I.A. Persistent sodium current in layer 5 neocortical neurons is primarily generated in the proximal axon. *J. Neurosci.* **26**, 3465-3473 (2006). doi: [10.1523/JNEUROSCI.4907-05.2006](https://doi.org/10.1523/JNEUROSCI.4907-05.2006).
- [10] Katz, E., Stoler, O., Scheller, A., Khrapunsky, Y., Goebbels, S., Kirchhoff, F., Gutnick, M.J., Wolf, F. & Fleidervish, I.A. Role of sodium channel subtype in action potential generation by neocortical pyramidal neurons. *Proc. Natl. Acad. Sci. USA* **115**, 7184-7192 (2018). doi: [10.1073/pnas.1720493115](https://doi.org/10.1073/pnas.1720493115).
- [11] Spratt, P.W.E., Ben-Shalom, R., Keeshen, C.M., Burke, K.J. Jr, Clarkson, R.L., Sanders, S.J. & Bender, K.J. The Autism-Associated Gene Scn2a Contributes to Dendritic Excitability and Synaptic Function in the Prefrontal Cortex. *Neuron* **103**, 673-685 (2019). doi: [10.1016/j.neuron.2019.05.037](https://doi.org/10.1016/j.neuron.2019.05.037).
- [12] Hanemaaijer, N.A., Popovic, M.A., Wilders, X., Grasman, S., Pavón Arocas, O. & Kole, M.H. Ca<sup>2+</sup> entry through Na<sub>v</sub> channels generates submillisecond axonal Ca<sup>2+</sup> signaling. *Elife* **9**, e54566 (2020). doi: [10.7554/eLife.54566](https://doi.org/10.7554/eLife.54566).
- [13] Hedrich, U.B.S., Lauxmann, S. & Lerche, H. SCN2A channelopathies: Mechanisms and models. *Epilepsia* **60** Suppl 3, S68-S76 (2019). doi: [10.1111/epi.14731](https://doi.org/10.1111/epi.14731).
- [14] Menezes, L.F.S., Sabiá Júnior, E.F., Tibery, D.V., Carneiro, L.D.A. & Schwartz, E.F. Epilepsy-Related Voltage-Gated Sodium Channelopathies: A Review. *Front. Pharmacol.* **11**,1276 (2020). doi: [10.3389/fphar.2020.01276](https://doi.org/10.3389/fphar.2020.01276).
- [15] Filipis, L. & Canepari, M. Optical measurement of physiological sodium currents in the axon initial segment. *J. Physiol.* **599**, 49-66 (2021). doi: [10.1113/JP280554](https://doi.org/10.1113/JP280554).

- [16] Popovic, M., Vogt, K., Holthoff, K., Konnerth, A., Salzberg, B.M., Grinvald, A., Antic, S.D., Canepari, M. & Zecevic, D. Imaging Submillisecond Membrane Potential Changes from Individual Regions of Single Axons, Dendrites and Spines. *Adv. Exp. Med. Biol.* **859**, 57-101 (2015). doi: [10.1007/978-3-319-17641-3\\_3](https://doi.org/10.1007/978-3-319-17641-3_3).
- [17] Jaafari, N., De Waard, M. & Canepari, M. Imaging Fast Calcium Currents beyond the Limitations of Electrode Techniques. *Biophys. J.* **107**, 1280-1288 (2014). doi: [10.1016/j.bpj.2014.07.059](https://doi.org/10.1016/j.bpj.2014.07.059).
- [18] Jaafari, N. & Canepari M. Functional coupling of diverse voltage-gated Ca(2+) channels underlies high fidelity of fast dendritic Ca(2+) signals during burst firing. *J. Physiol.* **594**, 967-983 (2016). doi: [10.1113/JP271830](https://doi.org/10.1113/JP271830).
- [19] Ait Ouares, K., Jaafari, N. & Canepari, M. (2016) A generalised method to estimate the kinetics of fast Ca(2+) currents from Ca(2+) imaging experiments. *J. Neurosci. Methods* **268**, 66 -77 (2016). doi: [10.1016/j.jneumeth.2016.05.005](https://doi.org/10.1016/j.jneumeth.2016.05.005).
- [20] Kole, M.H., IIschner, S., Kampa, B., Williams, S.R., Ruben, P.C. & Stuart, G.J. Action potential generation requires a high sodium channel density in the axon initial segment. *Nat. Neurosci.* **11**, 178–186 (2008). doi: [10.1038/nn2040](https://doi.org/10.1038/nn2040).
- [21] Fleidervish, I.A., Lasser-Ross, N., Gutnick, M.J. & Ross, W.N. Na<sup>+</sup> imaging reveals little difference in action potential-evoked Na<sup>+</sup> influx between axon and soma. *Nat. Neurosci.* **13**, 852-860 (2010). doi: [10.1038/nn.2574](https://doi.org/10.1038/nn.2574).
- [22] Baranauskas, G., David, Y. & Fleidervish, I.A. Spatial mismatch between the Na<sup>+</sup> flux and spike initiation in axon initial segment. *Proc. Natl. Acad. Sci. USA* **110**, 4051-4056 (2013). doi: [10.1073/pnas.1215125110](https://doi.org/10.1073/pnas.1215125110).
- [23] Hallermann S, de Kock CP, Stuart GJ & Kole MH (2012). State and location dependence of action potential metabolic cost in cortical pyramidal neurons. *Nat. Neurosci.* **15**, 1007-1014. doi: [10.1038/nn.3132](https://doi.org/10.1038/nn.3132).
- [24] Cohen, C.C.H., Popovic, M.A., Klooster, J., Weil, M.T., Möbius, W., Nave, K.A. & Kole, M.H.P. Saltatory Conduction along Myelinated Axons Involves a Periaxonal Nanocircuit. *Cell* **180**, 311-322 (2020). doi: [10.1016/j.cell.2019.11.039](https://doi.org/10.1016/j.cell.2019.11.039).
- [25] Ait Ouares, K., Filipis, L., Tzilivaki, A., Poirazi, P. & Canepari, M. Two Distinct Sets of Ca<sup>2+</sup> and K<sup>+</sup> Channels Are Activated at Different Membrane Potentials by the Climbing Fiber Synaptic Potential in Purkinje Neuron Dendrites. *J. Neurosci.* **39**, 1969-1981 (2019). doi: [10.1523/JNEUROSCI.2155-18.2018](https://doi.org/10.1523/JNEUROSCI.2155-18.2018).
- [26] Bosmans, F., Rash, L., Zhu, S., Diochot, S., Lazdunski, M., Escoubas, P. & Tytgat, J. Four novel tarantula toxins as selective modulators of voltage-gated sodium channel subtypes. *Mol. Pharmacol.* **69**, 419-29 (2006). doi: [10.1124/mol.105.015941](https://doi.org/10.1124/mol.105.015941).
- [27] Xiao, Y., Jackson, J.O. 2<sup>nd</sup>, Liang, S. & Cummins, T.R. Common molecular determinants of tarantula huwentoxin-IV inhibition of Na<sup>+</sup> channel voltage sensors in domains II and IV. *J. Biol. Chem.* **286**, 27301-27310 (2011). doi: [10.1074/jbc.M111.246876](https://doi.org/10.1074/jbc.M111.246876).
- [28] Mainen, Z.F., Joerges, J., Huguenard, J.R. & Sejnowski, T.J. A model of spike initiation in neocortical pyramidal neurons. *Neuron* **15**, 1427-1439 (1995). doi: [10.1016/0896-6273\(95\)90020-9](https://doi.org/10.1016/0896-6273(95)90020-9).
- [29] Goldwyn, J.H., Remme, M.W.H. & Rinzel, J. Soma-axon coupling configurations that enhance neuronal coincidence detection. *PLoS Comput. Biol.* **15**, e1006476 (2019). doi: [10.1371/journal.pcbi.1006476](https://doi.org/10.1371/journal.pcbi.1006476).

- [30] Royeck, M., Horstmann, M.T., Remy, S., Reitze, M., Yaari, Y. & Beck, H. Role of axonal NaV1.6 sodium channels in action potential initiation of CA1 pyramidal neurons. *J. Neurophysiol.* **100**, 2361-2380 (2008). doi: [10.1152/jn.90332.2008](https://doi.org/10.1152/jn.90332.2008).
- [31] Cui, J., Yang, H. & Lee, U.S. Molecular mechanisms of BK channel activation. *Cell. Mol. Life Sci.* **66**, 852-875 (2009). doi: [10.1007/s00018-008-8609-x](https://doi.org/10.1007/s00018-008-8609-x).
- [32] Trimmer J.S. Subcellular localization of K<sup>+</sup> channels in mammalian brain neurons: remarkable precision in the midst of extraordinary complexity. *Neuron* **85**, 238-256 (2015). doi: [10.1016/j.neuron.2014.12.042](https://doi.org/10.1016/j.neuron.2014.12.042).
- [33] Rama, S., Zbili, M., Bialowas, A., Fronzaroli-Molinieres, L., Ankri, N., Carlier, E., Marra, V. & Debanne, D. Presynaptic hyperpolarization induces a fast analogue modulation of spike-evoked transmission mediated by axonal sodium channels. *Nat. Commun.* **6**, 10163 (2015). doi: [10.1038/ncomms10163](https://doi.org/10.1038/ncomms10163).
- [34] Gu, N., Vervaeke, K. & Storm, J.F. BK potassium channels facilitate high-frequency firing and cause early spike frequency adaptation in rat CA1 hippocampal pyramidal cells. *J. Physiol.* **580**, 859-82 (2007). doi: [10.1113/jphysiol.2006.126367](https://doi.org/10.1113/jphysiol.2006.126367).
- [35] Aru, J., Suzuki, M. & Larkum, M.E. Cellular Mechanisms of Conscious Processing. *Trends Cogn. Sci.* **24**, 814-825 (2020). doi: [10.1016/j.tics.2020.07.006](https://doi.org/10.1016/j.tics.2020.07.006).
- [36] Larkum, M.E., Kaiser, K.M. & Sakmann, B. Calcium electrogenesis in distal apical dendrites of layer 5 pyramidal cells at a critical frequency of back-propagating action potentials. *Proc. Natl. Acad. Sci. USA* **96**, 14600-14604 (1999). doi: [10.1073/pnas.96.25.14600](https://doi.org/10.1073/pnas.96.25.14600).
- [37] Goriounova, N.A., Heyer, D.B., Wilbers, R., Verhoog, M.B., Giugliano, M., Verbist, C., Obermayer, J., Kerkhofs, A., Smeding, H., Verberne, M., Idema, S., Baayen, J.C., Pieneman, A.W., de Kock, C.P., Klein, M. & Mansvelder, H.D. Large and fast human pyramidal neurons associate with intelligence. *Elife* **7**, e41714 (2018). doi: [10.7554/eLife.41714](https://doi.org/10.7554/eLife.41714).
- [38] Meisler, M.H., Hill, S.F. & Yu, W. Sodium channelopathies in neurodevelopmental disorders. *Nat. Rev. Neurosci.* **22**, 152-166 (2021). doi: [10.1038/s41583-020-00418-4](https://doi.org/10.1038/s41583-020-00418-4).
- [39] Crawford, K., Xian, J., Helbig, K.L., Galer, P.D., Parthasarathy, S., Lewis-Smith, D., Kaufman, M.C., Fitch, E., Ganesan, S., O'Brien, M., Codoni, V., Ellis, C.A., Conway, L.J., Taylor, D., Krause, R. & Helbig, I. Computational analysis of 10,860 phenotypic annotations in individuals with SCN2A-related disorders. *Genet. Med.* **23**, 1263-1272 (2021). doi: [10.1038/s41436-021-01120-1](https://doi.org/10.1038/s41436-021-01120-1).
- [40] Bailey, C.S., Moldenhauer, H.J., Park, S.M., Keros, S. & Meredith, A.L. *KCNMA1*-linked channelopathy. *J. Gen. Physiol.* **151**, 1173-1189 (2019). doi: [10.1085/jgp.201912457](https://doi.org/10.1085/jgp.201912457).
- [41] Heron, S.E., Crossland, K.M., Andermann, E., Phillips, H.A., Hall, A.J., Bleasel, A., Shevell, M., Mercho, S., Seni, M.H., Guiot, M.C., Mulley, J.C., Berkovic, S.F. & Scheffer, I.E. Sodium-channel defects in benign familial neonatal-infantile seizures. *Lancet* **360**, 851-852. (2002). doi: [10.1016/S0140-6736\(02\)09968-3](https://doi.org/10.1016/S0140-6736(02)09968-3).
- [42] Wolff, M., Brunklaus, A. & Zuberi, S.M. Phenotypic spectrum and genetics of SCN2A-related disorders, treatment options, and outcomes in epilepsy and beyond. *Epilepsia* **60**, 59-67 (2019). doi: [10.1111/epi.14935](https://doi.org/10.1111/epi.14935).
- [43] Li, T., Tian, C., Scalmani, P., Frassoni, C., Mantegazza, M., Wang, Y., Yang, M., Wu, S. & Shu Y. Action potential initiation in neocortical inhibitory interneurons. *PLoS Biol.* **12**, e1001944 (2014). doi: [10.1371/journal.pbio.1001944](https://doi.org/10.1371/journal.pbio.1001944).

- [44] Léna, I. & Mantegazza, M.  $\text{Na}_v1.2$  haploinsufficiency in *Scn2a* knock-out mice causes an autistic-like phenotype attenuated with age. *Sci. Rep.* **9**, 12886 (2019). doi: [10.1038/s41598-019-49392-7](https://doi.org/10.1038/s41598-019-49392-7).
- [45] Miyamoto, H., Tatsukawa, T., Shimohata, A., Yamagata, T., Suzuki, T., Amano, K., Mazaki, E., Raveau, M., Ogiwara, I., Oba-Asaka, A., Hensch, T.K., Itohara, S., Sakimura, K., Kobayashi, K., Kobayashi, K. & Yamakawa K. Impaired cortico-striatal excitatory transmission triggers epilepsy. *Nat. Commun.* **10**, 1917 (2019). doi: [10.1038/s41467-019-09954-9](https://doi.org/10.1038/s41467-019-09954-9).
- [46] Spratt, P.W.E., Alexander, R.P.D., Ben-Shalom, R., Sahagun, A., Kyoung, H., Keeshen, C.M., Sanders, S.J. & Bender, K.J. Paradoxical hyperexcitability from  $\text{Na(V)}1.2$  sodium channel loss in neocortical pyramidal cells. *Cell Rep.* **36**, 109483 (2021). doi: [10.1016/j.celrep.2021.109483](https://doi.org/10.1016/j.celrep.2021.109483).
- [47] Echevarria-Cooper, D.M., Hawkins, N.A., Misra, S.N., Huffman, A., Thaxton, T., Thompson, C.H., Ben-Shalom, R., Nelson, A.D., Lipkin, A.M., George Jr, A.L., Bender, K.J. & Kearney J.A. Cellular and behavioral effects of altered  $\text{Na}_v1.2$  sodium channel ion permeability in *Scn2a*<sup>K1422E</sup> mice. *bioRxiv* (2021) doi: [10.1101/2021.07.19.452930](https://doi.org/10.1101/2021.07.19.452930).
- [48] Lopez, L., Montnach, J., Oliveira-Mendes, B., Khakh, K., Thomas, B., Lin, S., Caumes, C., Wesolowski, S., Nicolas, S., Servent, D., Cohen, C., Bérout, R., Benoit, E. & De Waard M. In vivo spatiotemporal control of voltage-gated ion channels by using 1 photoactivatable peptidic toxins. *Front. Cell. Dev. Biol.* **9**, 798588 (2021). doi: [10.3389/fcell.2021.798588](https://doi.org/10.3389/fcell.2021.798588).
- [49] Montnach, J., Blömer, L.A., Lopez, L., Filipis, L., Meudal, H., Lafoux, A., Nicolas, S., Chu, D., Caumes, C., Bérout, R., Jopling, C., Bosmans, F., Huchet, C., Landon, C., Canepari, M. & De Waard, M. Synthetic Analogues of Huwentoxin-IV Spider Peptide With Altered Human  $\text{Na}_v1.7/\text{Na}_v1.6$  Selectivity Ratios. *Nat. Commun.* **13**, 417 (2022). doi: [10.1038/s41467-022-27974-w](https://doi.org/10.1038/s41467-022-27974-w).
- [50] Almog, M. & Korngreen A. A quantitative description of dendritic conductances and its application to dendritic excitation in layer 5 pyramidal neurons. *J. Neurosci.* **34**, 182-196 (2014). doi: [10.1523/JNEUROSCI.2896-13.2014](https://doi.org/10.1523/JNEUROSCI.2896-13.2014).
- [51] Lipkin, A.M., Cunniff, M.M., Spratt, P.W.E., Lemke, S.M. & Bender, K.J. Functional Microstructure of  $\text{Ca}_v$ -Mediated Calcium Signaling in the Axon Initial Segment. *J. Neurosci.* **41**, 3764-3776 (2021). doi: [10.1523/JNEUROSCI.2843-20.2021](https://doi.org/10.1523/JNEUROSCI.2843-20.2021).
- [52] Canepari, M. & Mammano, F. Imaging neuronal calcium fluorescence at high spatio-temporal resolution. *J. Neurosci. Methods* **87**, 1-11 (1999). doi: [10.1016/s0165-0270\(98\)00127-7](https://doi.org/10.1016/s0165-0270(98)00127-7).
- [53] Delvendahl, I., Jablonski, L., Baade, C., Matveev, V., Neher, E. & Hallermann, S. Reduced endogenous  $\text{Ca}^{2+}$  buffering speeds active zone  $\text{Ca}^{2+}$  signaling. *Proc. Natl. Acad. Sci. USA* **112**: 3075-3084 (2015). doi: [10.1073/pnas.1508419112](https://doi.org/10.1073/pnas.1508419112).
- [54] Kim, Y., Hsu, C.L., Cembrowski, M.S., Mensh, B.D. & Spruston, N. Dendritic sodium spikes are required for long-term potentiation at distal synapses on hippocampal pyramidal neurons. *Elife* **4**, e06414 (2015). doi: [10.7554/eLife.06414](https://doi.org/10.7554/eLife.06414).
- [55] Migliore, M., Novara, G. & Tegolo, D. Single neuron binding properties and the magical number 7. *Hippocampus* **18**, 1122-1130 (2008). doi: [10.1002/hipo.20480](https://doi.org/10.1002/hipo.20480).
- [56] Mahapatra, C., Brain, K.L. & Manchanda, R. A biophysically constrained computational model of the action potential of mouse urinary bladder smooth muscle. *PLoS One* **13**, e0200712 (2018). doi: [10.1371/journal.pone.0200712](https://doi.org/10.1371/journal.pone.0200712).



## Supplementary information Filipis, Blömer et al.

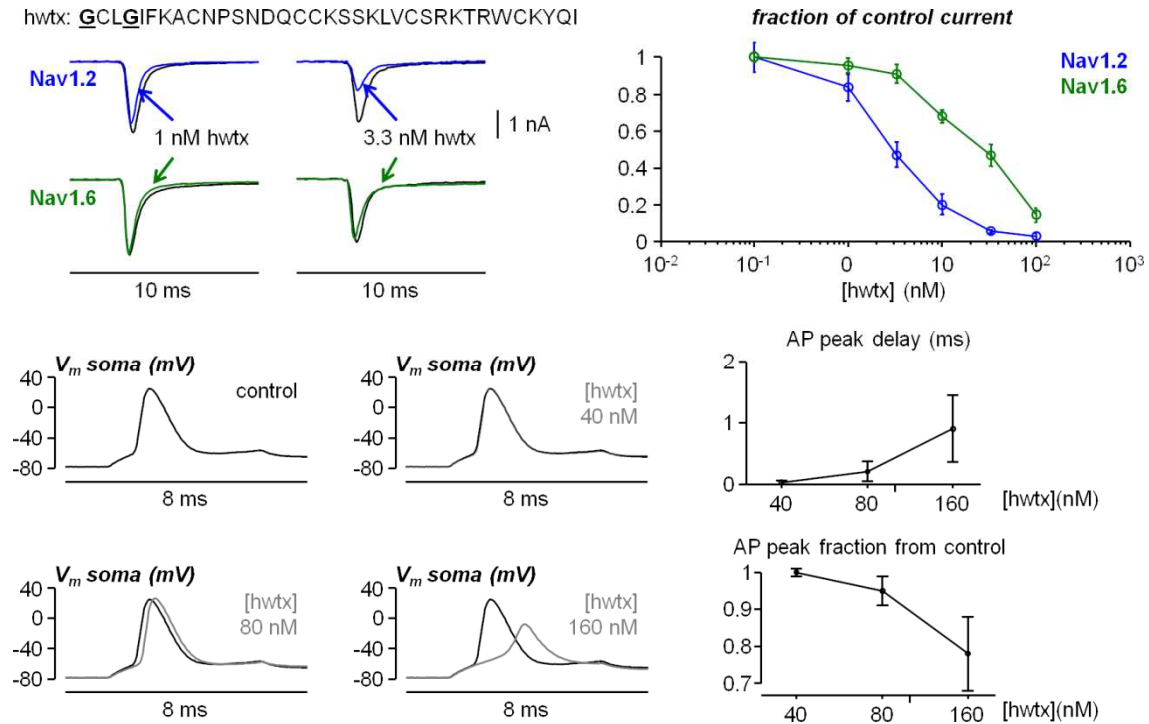

**Supplementary Figure S1 | Selectivity of 1G4GHuwentoxin-IV (hwtx) for Nav1.2 against Nav1.6.** Top-left, currents recorded in HEK293 cells expressing either Nav1.2 (blue) or Nav1.6 (green) in control solution and after addition of hwtx at 1 nM (left traces) or at 3.3 nM (right traces); the 35-aminoacids sequence of hwtx is reported; the two residues mutated from the wild type peptide are indicated with bold-underlined characters. Top-Right, fraction of Nav1.2 (green) or Nav1.6 (blue) current peak from control condition (no hwtx) against hwtx concentration (mean  $\pm$  SD); each concentration-point has been calculated over 10-15 cells. Bottom-Left, in a L5 pyramidal neuron in brain slices, AP elicited in control condition (no hwtx) or in the presence of 40 nM, 80 nM or 160 nM hwtx. Bottom-Right, delay of the AP peak and AP peak fraction from control condition against hwtx concentration (mean  $\pm$  SD, N = 7 cells).

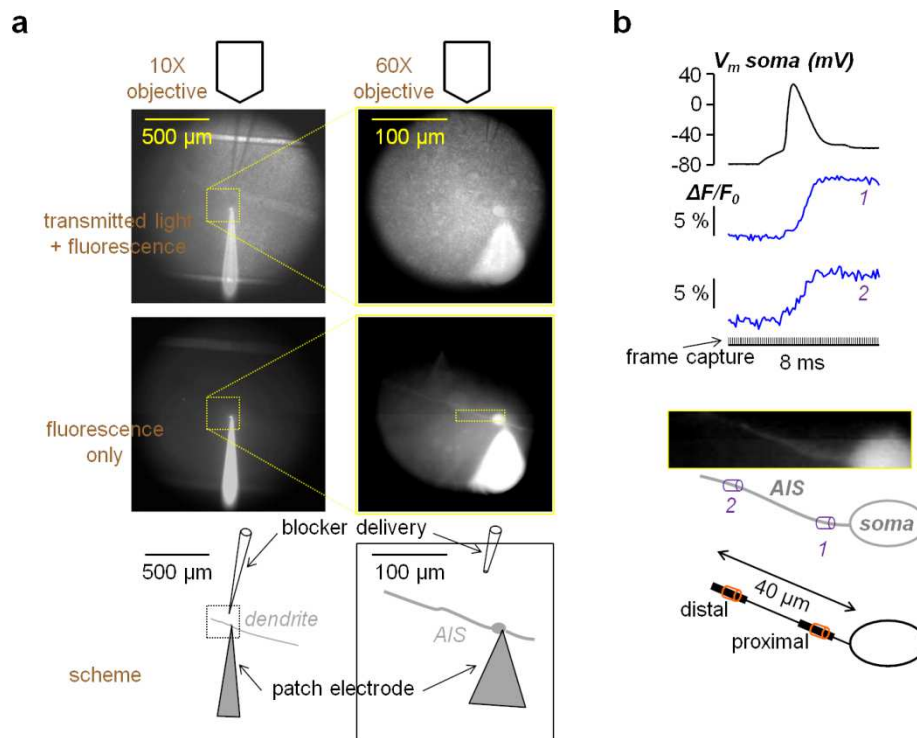

**Supplementary Figure S2 | Illustrations of the experimental configuration and of the recording protocol used in the study.** **a**, Illustration of the experimental configuration. A brain slice (somatosensory cortex) is visualised by the DaVinci-2K camera using a 10X magnification objective (images on the left) and a 60X magnification objective (images on the right); the images on the top are taken with transmitted IR light and fluorescence simultaneously; the images below are taken with fluorescence only; as indicated in the scheme below, a patch clamp electrode (also used to elicit APs and to record somatic  $V_m$ ) is used to load through the soma a L5 pyramidal neuron with a fluorescent indicator, while a pipette positioned near the AIS is used to locally deliver a solution containing a channel blocker, by gentle pressure application, for 1 minute. **b**, In the recording protocol, images of  $\sim 64 \times 15 \mu\text{m}^2$  comprising the AIS are acquired at the frame rate of 10 kHz; to unambiguously distinguish signals from proximal and distal areas of the AIS, with respect to the soma, we systematically analysed every signal in a region of  $5 \mu\text{m}$  long at a position “1”, within 5 and 15  $\mu\text{m}$  from the soma and in another region of  $5 \mu\text{m}$  long at a position “2”, within 30 and 40  $\mu\text{m}$  from the soma; on the top, an AP is elicited and recorded at the soma (at 20 kHz) and the fluorescence signals ( $\text{Ca}^{2+}$  in this example) at positions 1 and 2 are reported.

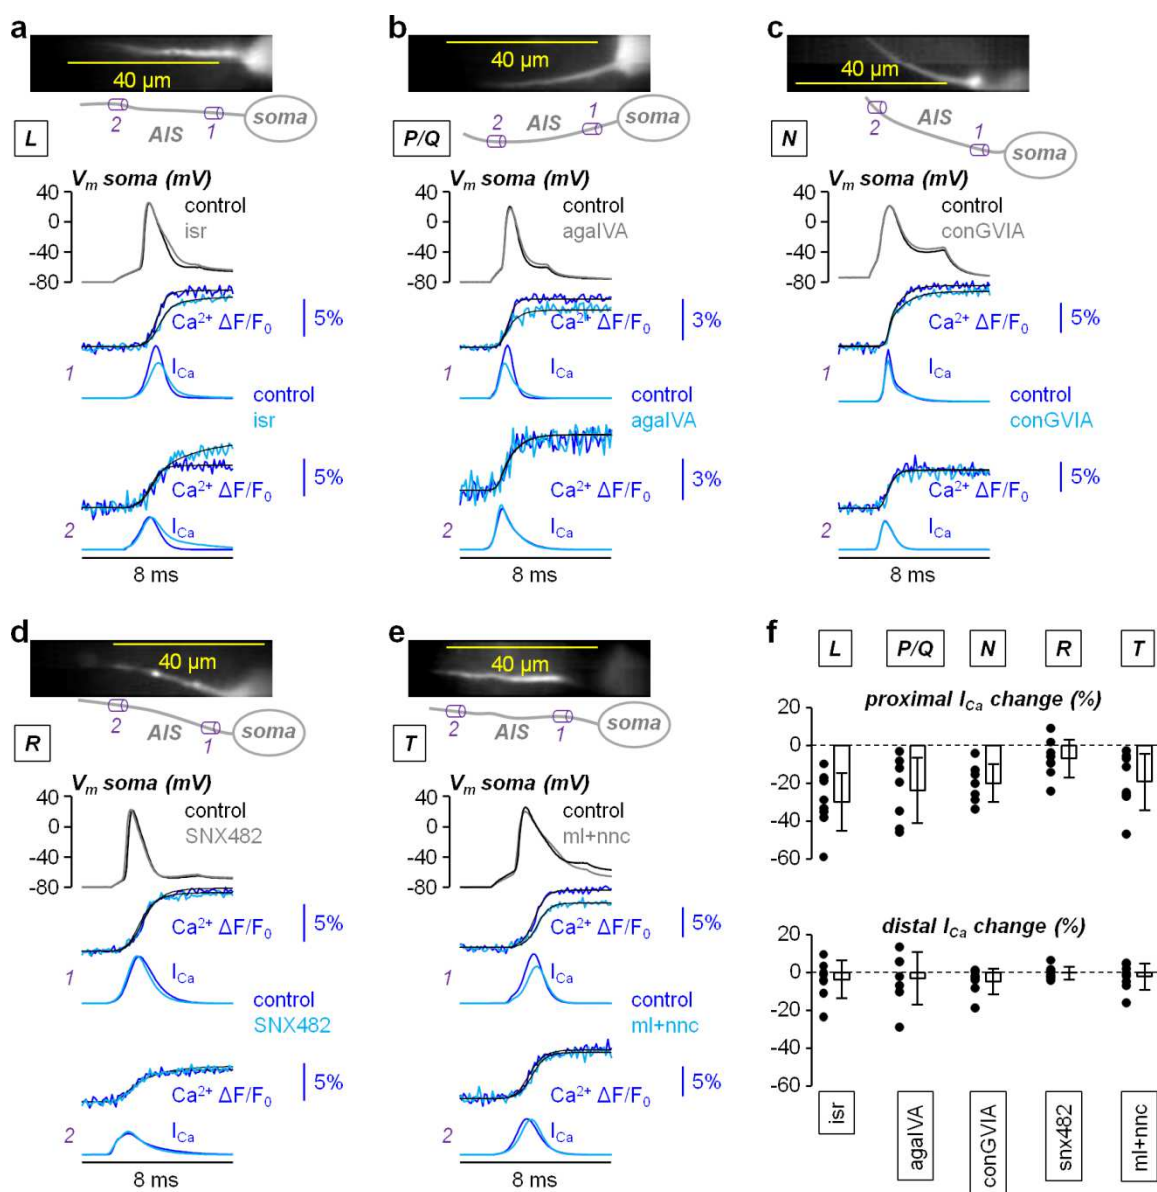

**Supplementary Figure S3 | Analysis of the  $Ca^{2+}$  current ( $I_{Ca}$ ) components mediated by individual VGCC types in the AIS.** **a**, Top, fluorescence image ( $Ca^{2+}$  indicator OG5N) of the AIS and its reconstruction with a proximal region (1) and a distal (2) region indicated. Middle, Somatic AP in control solution and after locally delivering 20  $\mu$ M of the L-type VGCC inhibitor isradipine (isr). Bottom,  $Ca^{2+}$  transients associated with the APs above fitted with the product of four sigmoid functions (black traces) and  $I_{Ca}$  signals derived from the fits. **b**, Same protocol of panel a, but locally delivering 1  $\mu$ M of the P/Q-type VGCC inhibitor  $\omega$ -agatoxin-IVA (agalVA). **c**, Same protocol of panel a, but locally delivering 1  $\mu$ M of the N-type VGCC inhibitor  $\omega$ -conotoxin-GVIA (conGVIA). **d**, Same protocol of panel a, but locally delivering 1  $\mu$ M of the R-type VGCC inhibitor SNX482. **e**, Same protocol of panel a, but locally delivering 5  $\mu$ M and 30  $\mu$ M, respectively, of the T-type VGCC inhibitors ML218 and NNC550396 (ml+nnc). **f**, Top, single values and percentage change of the  $I_{Ca}$  peak in proximal regions after addition of isr (N = 7 cells, mean  $\pm$  SD =  $-29.9 \pm 17.0$ ), after addition of agalVA (N = 8 cells, mean  $\pm$  SD =  $-23.9 \pm 17.4$ ), after addition of conGVIA (N = 7 cells, mean  $\pm$  SD =  $-20.2 \pm 10.1$ ), after addition of SNX482 (N = 8 cells, mean  $\pm$  SD =  $-7.1 \pm 10.0$ ) or after addition of ml+nnc (N = 8 cells, mean  $\pm$  SD =  $-19.0 \pm 14.9$ ). Bottom, in the same cells, single values and percentage change of the  $I_{Ca}$  peak in distal regions after addition of isr (mean  $\pm$  SD =  $-3.8 \pm 10.0$ ), after addition of agalVA (mean  $\pm$  SD =  $-3.3 \pm 13.9$ ), after addition of conGVIA (mean  $\pm$  SD =  $-4.8 \pm 6.8$ ), after addition of SNX482 (mean  $\pm$  SD =  $-0.2 \pm 3.4$ ) or after addition of ml+nnc (mean  $\pm$  SD =  $-2.3 \pm 7.0$ ).

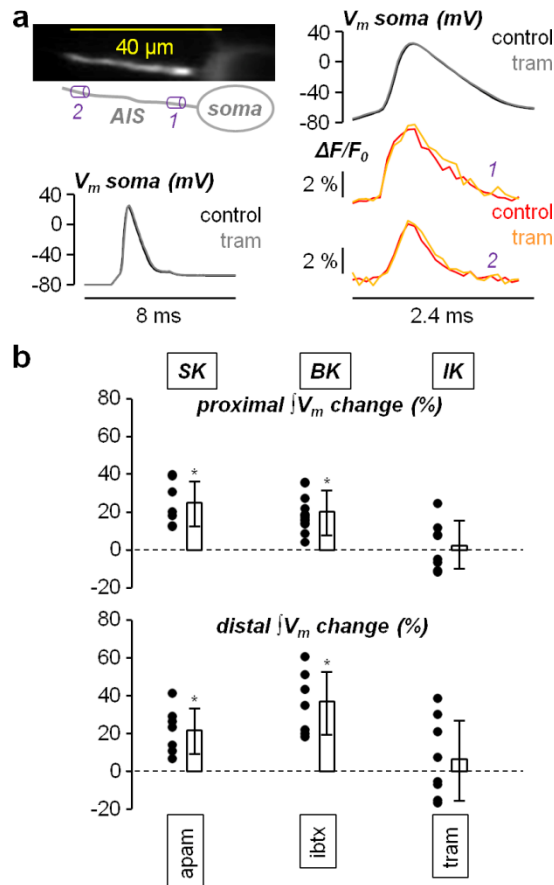

**Supplementary Figure S4 | Analysis of the effect of blocking IK CAKCs on the AP waveform in the AIS.** **a**, Left, fluorescence image (voltage sensitive dye JPW1114) of the AIS and its reconstruction with a proximal region (1) and a distal (2) region indicated; a somatic AP before and after locally delivering 1  $\mu\text{M}$  of the IK CAKC inhibitor tram-34 (tram) is reported below. Right, Somatic AP in control solution and after tram-34 delivery and associated  $V_m$  transients in 1 and 2. **b**, Top, single values and percentage change of the proximal  $\Delta V_m$  signal maximum (see analysis in Fig. 2 and in Fig. 4) after delivering tram-34 (N = 8 cells, mean  $\pm$  SD = 2.2  $\pm$  12.7); the values and statistics for the same test performed with the SK CAKC inhibitor apamin (apam) or with the BK CAKC inhibitor iberiotoxin (ibtX) (same as in Fig. 4a) are reported on the left. Bottom, in the same cells, single values and percentage change of the distal  $\Delta V_m$  signal maximum after delivering tram-34 (mean  $\pm$  SD = 6.7  $\pm$  21.1); the values and statistics for the same test performed with the SK CAKC inhibitor apamin or with the BK CAKC inhibitor iberiotoxin (same as in Fig. 4a) are reported on the left.

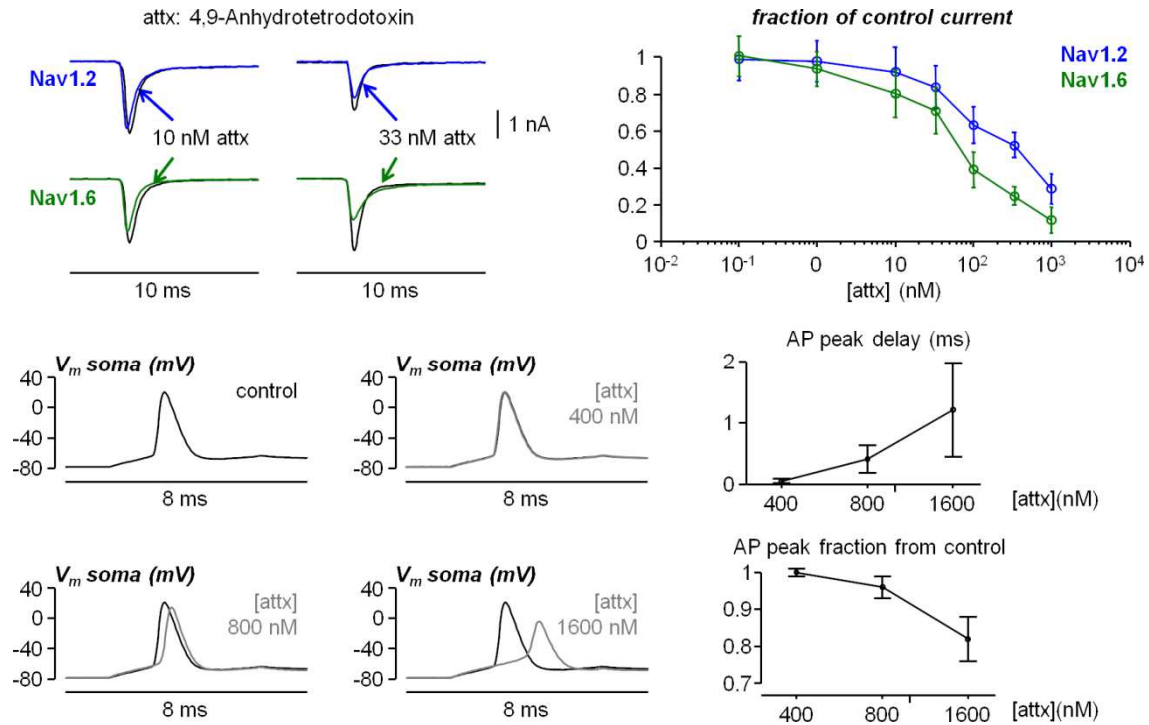

### Supplementary Figure S5 | Selectivity of 4,9-Anhydrotetrodotoxin (attx) for Nav1.6 against Nav1.2.

Top-left, currents recorded in HEK293 cells expressing either Nav1.2 (blue) or Nav1.6 (green) in control solution and after addition of attx at 10 nM (left traces) or at 33 nM (right traces). Top-Right, fraction of Nav1.2 (green) or Nav1.6 (blue) current peak from control condition (no attx) against attx concentration (mean  $\pm$  SD); each concentration-point has been calculated over 10-15 cells. Bottom-Left, in a L5 pyramidal neuron in brain slices, AP elicited in control condition (no attx) or in the presence of 40 nM, 80 nM or 160 nM attx. Bottom-Right, delay of the AP peak and AP peak fraction from control condition against attx concentration (mean  $\pm$  SD, N = 7 cells).



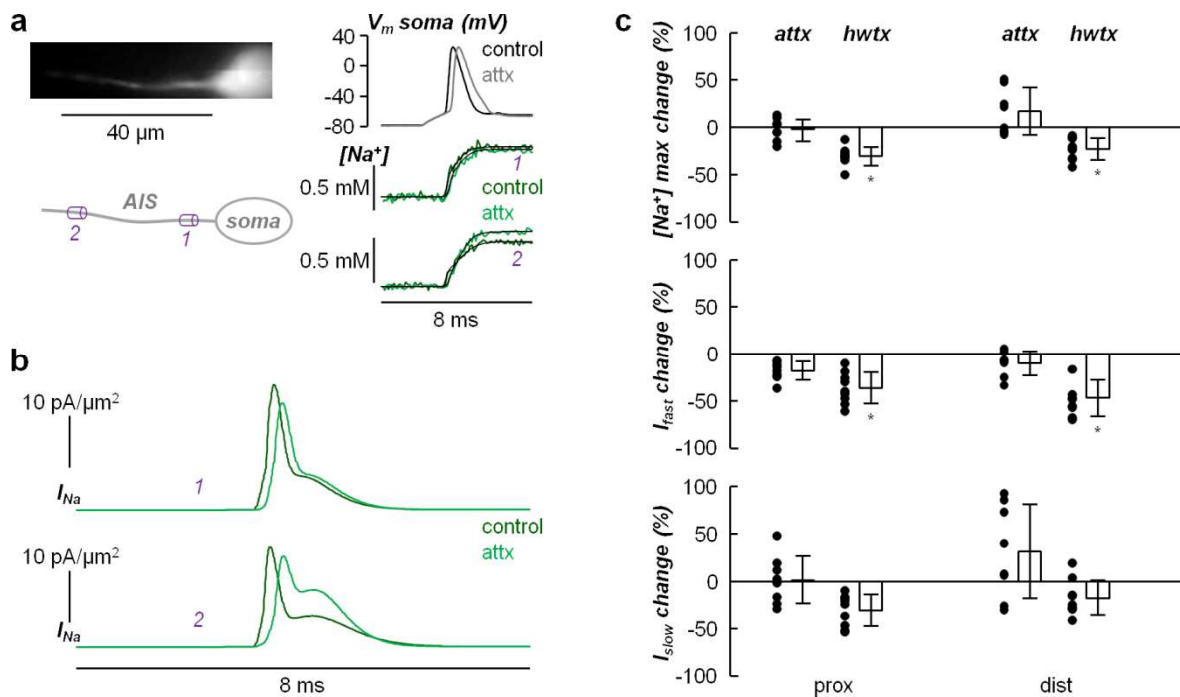

**Supplementary Figure S6 | Analysis of the effect of 4,9-anhydrotetrodotoxin (attx) on the  $\text{Na}^+$  influx in the AIS.** **a**, Left, fluorescence image ( $\text{Na}^+$  indicator ING-2) of the AIS and its reconstruction with a proximal region (1) and a distal (2) region indicated. Right, Somatic AP in control solution and after locally delivering 800 nM of attx (top) and associated corrected  $\text{Na}^+$  transients fitted with a model function in 1 and 2. **b**, From the experiment in a,  $\text{Na}^+$  currents calculated from the time-derivative of the  $\text{Na}^+$  transient fits. **c**, Top, percentual change of the  $\text{Na}^+$  transient maximum after addition of attx ( $N = 8$  cells) in proximal regions (mean  $\pm$  SD =  $-1.9 \pm 11.6$ ), and in distal regions (mean  $\pm$  SD =  $16.8 \pm 24.8$ ); the values and statistics of the equivalent experiments with hwtx (Fig. 1) are reported for comparison. Middle, percentual change of the fast component of the  $\text{Na}^+$  current ( $I_{\text{fast}}$ ) after addition of attx in proximal regions (mean  $\pm$  SD =  $-17.9 \pm 9.9$ ), and in distal regions (mean  $\pm$  SD =  $10.2 \pm 13.1$ ); the values and statistics of the equivalent experiments with hwtx are reported for comparison. Bottom, percentual change of the slow component of the  $\text{Na}^+$  current ( $I_{\text{slow}}$ ) after addition of attx in proximal regions (mean  $\pm$  SD =  $1.4 \pm 25.2$ ), and in distal regions (mean  $\pm$  SD =  $31.5 \pm 49.4$ ); the values and statistics of the equivalent experiments with hwtx (Fig. 1c) are reported for comparison; "\*" indicates a significant change ( $p < 0.01$ , paired t-test).

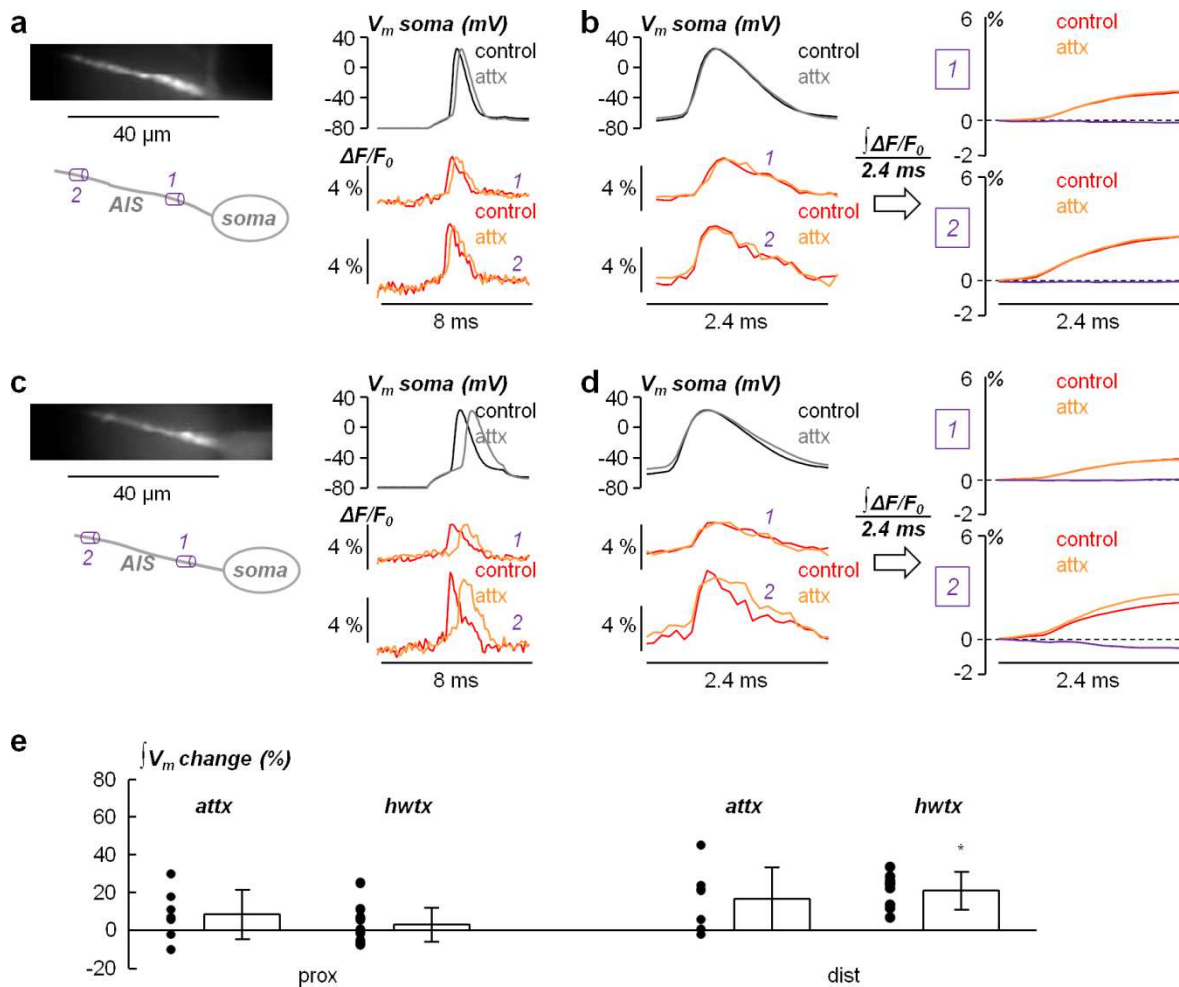

**Supplementary Figure S7 | Analysis of the effect of attx on the AP waveform in the AIS.** **a**, Left, fluorescence image (JPW1114) of the AIS and its reconstruction with a proximal region (1) and a distal (2) region indicated. Right, Somatic AP in control solution and after locally delivering 800 nM attx (top) and associated  $V_m$  transients in 1 and 2. **b**, Left, somatic and axonal APs at a different time scale (2.4 ms duration). Right, quantification of the AP waveform shape by calculation of  $V_m$  integral ( $\int V_m$ ) over the 2.4 ms time window comprising the AP signal. In this cell, the local delivery of attx does not change the waveform of the axonal AP. **c** and **d**, same as **a** and **b** in another cell where the local delivery of attx widens the waveform of the axonal AP at the distal site. **e**, Percentual change of the  $\int V_m$  signal maximum after delivery of attx (N=7 cells) in proximal regions (mean  $\pm$  SD =  $8.6 \pm 13.1$ ), and in distal regions (mean  $\pm$  SD =  $16.7 \pm 16.5$ ); the values and statistics of the equivalent experiments with hwtx (Fig. 2c) are reported for comparison; "\*" indicates a significant change ( $p < 0.01$ , paired t-test).

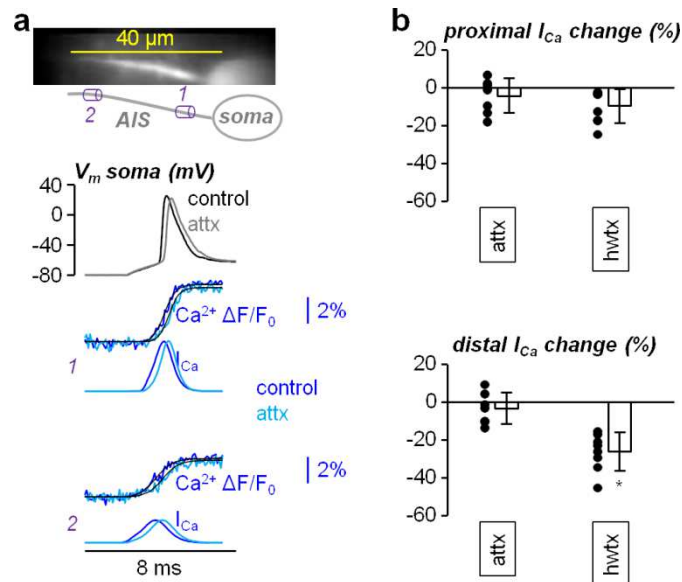

**Supplementary Figure S8 | Analysis of the effect of atx on the  $\text{Ca}^{2+}$  influx in the AIS.** **a**, Top,  $\text{Ca}^{2+}$  fluorescence image (OG5N) of the AIS and its reconstruction with a proximal region (1) and a distal (2) region indicated. Bottom, somatic AP and associated  $\text{Ca}^{2+}$  transients and currents in 1 and 2 in control solution and after locally delivering 800 nM atx. **b**, Top, single values and percentage change of the proximal  $\text{Ca}^{2+}$  current peak after addition of atx ( $N = 7$  cells, mean  $\pm$  SD =  $-4.5 \pm 9.2$ ). Right, in the same cells, single values and percentage change of the distal  $\text{Ca}^{2+}$  current peak after addition of atx (mean  $\pm$  SD =  $-3.6 \pm 8.3$ ); the values and statistics of the equivalent experiments with hwtx (Fig. 3e) are reported for comparison; "\*" indicates a significant change ( $p < 0.01$ , paired t-test).
